# Supplementary material for: Whole-Genome Profile of Greek Patients with Teratozοοspermia: Identification of Candidate Variants and Genes
Source: MDPI journal article supplement (doi:10.3390/genes13091606), 2022-09-08
Supplement: s1 [file s1]

**Table S3.** Prioritized splice-disrupting variants found in teratozoospermic individuals. Variants not found in the 1000 Genomes Project are highlighted because they were also searched in the gnomAD database. Ref; Reference allele, Obs; Observed allele

| Variant      | Location              | Gene            | Ref                                                            | Obs                                                                  | Frequency<br>(Europe)         | CADD<br>Score |
|--------------|-----------------------|-----------------|----------------------------------------------------------------|----------------------------------------------------------------------|-------------------------------|---------------|
| rs1316432783 | 1:92979088-92979126   | <i>EVI5</i>     | TATATA<br>TATATA<br>TATATA<br>TATATA<br>TATATA<br>TATATG<br>TA | TA                                                                   | 0.0005<br>(gnomAD<br>genomes) | -             |
| rs58564752   | 3:75834065-75834065   | <i>ZNF717</i>   | C                                                              | T                                                                    | 0.0290                        | 12.78         |
| rs200024034  | 3:135825050-135825056 | <i>PPP2R3A</i>  | CAATC<br>A                                                     | CAATC<br>AATCA                                                       | 0.0260                        | -             |
| -            | 5:79864769-79864772   | <i>ANKRD34B</i> | AGAG                                                           | GAGAG<br>AGAGA<br>GAGTG<br>AG                                        | -                             | -             |
| rs200095891  | 5:137588969-137588972 | <i>GFRA3</i>    | CCC                                                            | CCCCC                                                                | 0.0200                        | -             |
| rs372152035  | 6:46690519-46690519   | <i>PLA2G7</i>   | C                                                              | A                                                                    | 0.0088<br>(gnomAD<br>exomes)  | 34            |
| -            | 7:55621478-55621503   | <i>VOPP1</i>    | ACACA<br>CACAC<br>ACACA<br>CACAC<br>ACTCAC                     | CAC                                                                  | -                             | -             |
| rs530625473  | 7:96635363-96635411   | <i>DLX6</i>     | GCAGC<br>AGCAG<br>CAGCA<br>GCAGC<br>AACA                       | GCAGC<br>AGCAG<br>CAGCA<br>AACAG<br>CAGCA<br>GCAGC<br>AGCAG<br>CAGCA | 0.0010                        | -             |
| -            | 7:154378874-154378874 | <i>DPP6</i>     | A                                                              | G                                                                    | -                             | -             |
| -            | 8:87536928-87536930   | <i>CPNE3</i>    | TTG                                                            | TTTTTG<br>TG                                                         | -                             | -             |
| -            | 8:103862219-103862234 | <i>AZIN1</i>    | TTACAC<br>ACCTGC<br>TACA                                       | TACA                                                                 | -                             | -             |
| rs1367447570 | 16:66638633-66638633  | <i>CMTM3</i>    | G                                                              | A                                                                    | -                             | 22.1          |
| rs536045893  | 17:5071419-5071419    | <i>USP6</i>     | G                                                              | A                                                                    | 0.0000                        | 28.9          |
| rs1426613652 | 17:7475188-7475237    | <i>SEN3</i>     | ATATAT<br>ATATAT<br>ATATAT<br>ATATAT<br>ATATAT                 | ATATAT<br>A                                                          | -                             | -             |

|              |                      |         |        |        |          |       |
|--------------|----------------------|---------|--------|--------|----------|-------|
|              |                      |         | ATATAT |        |          |       |
|              |                      |         | ATAAA  |        |          |       |
|              |                      |         | AATAT  |        |          |       |
|              |                      |         | ATA    |        |          |       |
| rs1432556786 | 18:10666808-10666811 | PIEZO2  | AGC    | -      | -        | -     |
| rs61095568   | 19:490040-490040     | MADCAM1 | G      | A      | 0.0100   | 12.30 |
|              |                      |         |        | AATAA  |          |       |
|              |                      |         | AATAA  | TAATA  |          |       |
|              |                      |         | TAATA  | ATAAT  |          |       |
| rs59993623   | 19:14050681-14050704 | PODNL1  | ATAAT  | AATAA  | 0.0001   | -     |
|              |                      |         | AATAA  | TAATA  | (gnomAD) |       |
|              |                      |         | TAA    | ATAAT  |          |       |
|              |                      |         |        | AA     |          |       |
| rs3833228    | 19:16770761-16770766 | SMIM7   | CTACT  | CTACTA | 0.0130   | -     |
|              |                      |         |        | CT     |          |       |
|              |                      |         |        | ATATAT |          |       |
| rs879668084  | 19:35099589-35099590 | SCGB2B2 | A      | ATATAC | 0.0000   | -     |
|              |                      |         |        | A      | (gnomAD) |       |

---
