# Supplementary material for: Whole-Genome Profile of Greek Patients with Teratozοοspermia: Identification of Candidate Variants and Genes
Source: MDPI journal article supplement (doi:10.3390/genes13091606), 2022-09-08
Supplement: s1 [file s1]

**Table S2.** Prioritized frameshift variants found in teratozoospermic individuals. Variants not found in the 1000 Genomes Project are highlighted because they were also searched in the gnomAD database. Ref; Reference allele, Obs; Observed allele

| Variant      | Location               | Gene            | Ref                                                                                                     | Obs                                                                                                                         | Frequency (Europe)            |
|--------------|------------------------|-----------------|---------------------------------------------------------------------------------------------------------|-----------------------------------------------------------------------------------------------------------------------------|-------------------------------|
| rs374993061  | 20:29965207-29965211   | <i>DEFB119</i>  | ACTG                                                                                                    | -                                                                                                                           | 0.0000                        |
| rs746234865  | 12:117289581-117289602 | <i>RNFT2</i>    | AGGAA<br>GGAA                                                                                           | AGGAAG<br>GAAGGA<br>AGGAA                                                                                                   | 0.0000<br>(gnomAD)            |
| rs570740564  | 17:29626554-29626555   | <i>NF1</i>      | T                                                                                                       | -                                                                                                                           | 0.0000<br>(gnomAD)            |
| rs2231925    | 3:73111724-73111724    | <i>EBLN2</i>    | T                                                                                                       | G                                                                                                                           | 0.0100                        |
| rs768887632  | 14:22924269-22924270   | <i>TRDJ4</i>    | T                                                                                                       | -                                                                                                                           | 0.0001<br>(gnomAD)            |
| rs762035521  | 7:143095834-143095850  | <i>EPHA1</i>    | GCCCCC<br>GGGCC<br>CCCGG                                                                                | GCCCCCG<br>GGCCCCC<br>GGGCC<br>CCGG                                                                                         | 0.0010<br>(gnomAD<br>genomes) |
| rs774160685  | 4:42461515-42461518    | <i>ATP8A1</i>   | TGT                                                                                                     | T                                                                                                                           | 0.0020<br>(gnomAD)            |
| rs139270644  | 7:44118249-44118251    | <i>POLM</i>     | CT                                                                                                      | -                                                                                                                           | 0.0020                        |
| rs540318536  | 22:39176877-39176878   | <i>DNAL4</i>    | C                                                                                                       | -                                                                                                                           | 0.0030                        |
| rs534542684  | 14:58899156-58899157   | <i>KIAA0586</i> | G                                                                                                       | -                                                                                                                           | 0.0070                        |
| rs529180941  | 19:23328751-23328752   | <i>ZNF730</i>   | T                                                                                                       | TT                                                                                                                          | 0.0070                        |
| rs66858778   | 19:49619102-49619103   | <i>LIN7B</i>    | G                                                                                                       | -                                                                                                                           | 0.0000<br>(gnomAD)            |
| rs150536607  | 8:17137320-17137322    | <i>VPS37A</i>   | TA                                                                                                      | -                                                                                                                           | 0.0230                        |
| rs144060127  | 9:27524364-27524371    | <i>IFNK</i>     | TGTTTG<br>T                                                                                             | TGTTTGT<br>TTGT                                                                                                             | 0.0300                        |
| rs141244584  | 5:40841571-40841573    | <i>CARD6</i>    | TT                                                                                                      | -                                                                                                                           | 0.0320                        |
| rs142551217  | 8:10411512-10411515    | <i>PRSS55</i>   | GGG                                                                                                     | GG                                                                                                                          | 0.0360                        |
| -            | 3:12942848-12942850    | <i>IQSEC1</i>   | GG                                                                                                      | G                                                                                                                           | -                             |
| -            | 8:98788168-98788183    | <i>LAPTM4B</i>  | GGGCT<br>CCAGG<br>CGAGG                                                                                 | GGGCTCC<br>AGGCGA<br>GGAGGG<br>CTCCAGG<br>CGAGG                                                                             | -                             |
| -            | 14:22591984-22591990   | <i>TRAV26-1</i> | CCCCCC                                                                                                  | CCCCCCC                                                                                                                     | -                             |
| rs1567262786 | 16:3779217-3779219     | <i>CREBBP</i>   | CC                                                                                                      | CCC                                                                                                                         | -                             |
| -            | 16:89952390-89952453   | <i>TCF25</i>    | TCTCTG<br>CGGCT<br>GCCCTT<br>CTCTGC<br>GGCTG<br>CCCTTC<br>TCTGCG<br>GCTGCC<br>CTTCTC<br>TGCGG<br>CTGCCC | TCTCTGC<br>GGCTGCC<br>CGTCTCT<br>GCGGCTG<br>CCCTTCT<br>CTGCGGC<br>TGCCCTT<br>CTCTGCG<br>GCTGCCC<br>TTCTCTG<br>CGGCTGC<br>CC | -                             |
| -            | 17:6945529-6945548     | <i>SLC16A11</i> | CACAG<br>CCCCA                                                                                          | CA                                                                                                                          | -                             |

|   |                      |      |       |     |   |
|---|----------------------|------|-------|-----|---|
|   |                      |      | GCCCA |     |   |
|   |                      |      | GTCA  |     |   |
| - | 17:79995492-79995493 | DCXR | T     | TGT | - |

---
