# Supplementary material for: Whole-Genome Profile of Greek Patients with Teratozοοspermia: Identification of Candidate Variants and Genes
Source: MDPI journal article supplement (doi:10.3390/genes13091606), 2022-09-08
Supplement: s1 [file s1]

**Table S1.** Prioritized nonsense variants found in teratozoospermic individuals. Variants not found in the 1000 Genomes Project are highlighted because they were also searched in the gnomAD database. Ref; Reference allele, Obs; Observed allele

| Variant      | Location               | Gene                | Ref | Obs | Frequency (Europe) | CADD Score |
|--------------|------------------------|---------------------|-----|-----|--------------------|------------|
| rs867145239  | 19:38028548-38028548   | <i>ZNF793</i>       | C   | T   | 0.0000 (gnomAD)    | 36         |
| rs199775799  | 12:110340895-110340895 | <i>TCHP</i>         | C   | T   | 0.0002 (gnomAD)    | 35         |
| rs774160685  | 4:42461515-42461518    | <i>ATP8A1</i>       | TGT | T   | 0.0020 (gnomAD)    | -          |
| rs2231925    | 3:73111724-73111724    | <i>EBLN2</i>        | T   | G   | 0.0100             | 31         |
| rs2293766    | 7:100371358-100371358  | <i>ZAN</i>          | G   | A   | 0.0100             | 48         |
| rs11571833   | 13:32972626-32972626   | <i>BRCA2</i>        | A   | T   | 0.0110             | 36         |
| rs141697489  | 12:69050235-69050235   | <i>RAP1B</i>        | G   | A   | 0.0180             | 10.44      |
| rs1343879    | X:75004529-75004529    | <i>MAGEE2</i>       | C   | A   | 0.0260             | 34         |
| rs36102575   | 16:48130781-48130781   | <i>ABCC12</i>       | C   | T   | 0.0310             | 42         |
| rs2728433    | 1:243328887-243328887  | <i>CEP170</i>       | G   | T   | 0.0410 (gnomAD)    | 32         |
| rs61750839   | 15:42162467-42162467   | <i>SPTBN5</i>       | G   | A   | 0.0360             | 35         |
| rs61742596   | 2:18766156-18766156    | <i>NT5C1B</i>       | G   | T   | 0.0450             | 35         |
| rs61742596   | 2:18766156-18766156    | <i>NT5C1B-RDH14</i> | G   | T   | 0.0450             | 35         |
| rs1553638067 | 3:38941409-38941409    | <i>SCN11A</i>       | C   | T   | -                  | 32         |
| rs1331040573 | 14:77493769-77493769   | <i>IRF2BPL</i>      | G   | A   | -                  | 33         |
| rs1235926839 | X:106846442-106846442  | <i>FRMPD3</i>       | C   | T   | -                  | 34         |
| rs1477940077 | 7:127999846-127999846  | <i>PRRT4</i>        | C   | T   | -                  | 36         |
| rs80315675   | 8:37641780-37641780    | <i>GPR124</i>       | C   | G   | -                  | 29.2       |
| -            | 4:177041040-177041040  | <i>WDR17</i>        | G   | A   | -                  | -          |
| -            | 7:23306189-23306189    | <i>GPNMB</i>        | C   | T   | -                  | -          |
