# Supplementary material for: Whole-Genome Profile of Greek Patients with Teratozοοspermia: Identification of Candidate Variants and Genes
Source: Genes (Basel). 2022 Sep 8;13(9):1606. doi: 10.3390/genes13091606 (PMC9498395; doi:10.3390/genes13091606)
Supplement: Supplementary file 1 [file genes-13-01606-s001.zip]

Archive with 5 entries (5 files):
- Table S1.pdf
- Table S2.pdf
- Table S3.pdf
- Table S4.xlsx
- Table S5.pdf
