# Supplementary material for: Whole-Genome Profile of Greek Patients with Teratozοοspermia: Identification of Candidate Variants and Genes
Source: Genes (Basel). 2022 Sep 8;13(9):1606. doi: 10.3390/genes13091606 (PMC9498395; doi:10.3390/genes13091606)
Supplement: Supplementary file 1 [file genes-13-01606-s001.zip › Table S4.xlsx]

## Sheet: Φύλλο1
Prioritized moderate impact variants found in teratozoospermic individuals
Location	Observed Allele	Frequency (Europe)	Reference Allele	Consequence	IMPACT	SYMBOL	Gene	cDNA position	CDS position	Protein position	Amino acids	Codons	Existing variation	SIFT	PolyPhen	CADD Score	Mutation Assessor
12:101679658-101679658	A	0.029	G	missense_variant,splice_region_variant	MODERATE	UTP20	ENSG00000120800	499	325	109	D/N	Gat/Aat	rs78440807	deleterious(0.02)	probably_damaging(1)	32	medium
12:106729832-106729832	A	0.000 (gnomAD genomes)	G	missense_variant	MODERATE	TCP11L2	ENSG00000166046	1157	983	328	R/H	cGt/cAt	rs1257767813	deleterious(0)	probably_damaging(1)	31	medium
12:112186274-112186274	T	0.034	C	missense_variant	MODERATE	ACAD10	ENSG00000111271	2657	1445	482	A/V	gCa/gTa	rs34245489	deleterious(0.04)	probably_damaging(0.946)	22.8	medium
12:124401027-124401027	A	0.011	C	missense_variant	MODERATE	DNAH10	ENSG00000197653	10417	10392	3464	D/E	gaC/gaA	rs61745785	deleterious(0.01)	probably_damaging(0.951)	24.2	medium
12:124402341-124402341	T	0.005	C	missense_variant	MODERATE	DNAH10	ENSG00000197653	10884	10859	3620	T/I	aCc/aTc	rs202063832	deleterious(0.03)	probably_damaging(0.967)	28.2	medium
12:129566566-129566566	C	0.005	Τ	missense_variant	MODERATE	TMEM132D	ENSG00000151952	1516	275	92	D/G	gAc/gGc	rs144217964	deleterious(0.02)	probably_damaging(0.945)	22.9	medium
12:131569105-131569105	T	0.026	C	missense_variant	MODERATE	GPR133	ENSG00000111452	2127	1568	523	S/L	tCg/tTg	rs11061318	deleterious(0)	possibly_damaging(0.9)	26.8	-
12:131569105-131569105	T	0.026	C	missense_variant	MODERATE	GPR133	ENSG00000111452	881	626	209	S/L	tCg/tTg	rs11061318	deleterious(0)	possibly_damaging(0.889)	26.8	-
12:131569105-131569105	T	0.026	C	missense_variant	MODERATE	GPR133	ENSG00000111452	1694	1664	555	S/L	tCg/tTg	rs11061318	deleterious(0)	possibly_damaging(0.851)	26.8	-
13:32906480-32906480	C	0.035	A	missense_variant	MODERATE	BRCA2	ENSG00000139618	1098	865	289	N/H	Aat/Cat	rs766173	deleterious(0.05)	possibly_damaging(0.861)	17.58	-
13:32906480-32906480	C	0.035	A	missense_variant	MODERATE	BRCA2	ENSG00000139618	1092	865	289	N/H	Aat/Cat	rs766173	deleterious(0.05)	possibly_damaging(0.861)	17.58	-
13:42385446-42385446	C	0.036	T	missense_variant	MODERATE	VWA8	ENSG00000102763	2083	1978	660	R/G	Aga/Gga	rs9562353	deleterious(0)	probably_damaging(0.999)	23.8	medium
13:42385446-42385446	C	0.036	T	missense_variant	MODERATE	VWA8	ENSG00000102763	2047	1978	660	R/G	Aga/Gga	rs9562353	deleterious(0)	probably_damaging(0.999)	23.8	medium
13:51825750-51825750	A	0.005	G	missense_variant	MODERATE	FAM124A	ENSG00000150510	382	247	83	E/K	Gag/Aag	rs146836694	deleterious(0)	probably_damaging(0.997)	22.6	medium
14:22363101-22363101	C	0.009 (gnomAD exomes)	G	missense_variant	MODERATE	TRAV8-4	ENSG00000211790	360	232	78	G/R	Ggc/Cgc	rs200152714	deleterious(0.01)	probably_damaging(0.999)	17.14	-
14:22573636-22573636	C	0.022	T	missense_variant	MODERATE	TRAV24	ENSG00000211805	17	17	6	L/S	tTg/tCg	rs61746511	deleterious(0)	possibly_damaging(0.829)	17.48	-
14:24533474-24533474	A	0.043	G	missense_variant	MODERATE	LRRC16B	ENSG00000186648	3156	287	96	R/H	cGt/cAt	rs117092113	deleterious(0.03)	probably_damaging(0.989)	25.2	-
14:24707479-24707479	A	0.041	G	missense_variant	MODERATE	GMPR2	ENSG00000100938	1056	725	242	G/D	gGt/gAt	rs34354104	deleterious(0.01)	probably_damaging(1)	31	high
14:24707479-24707479	A	0.041	G	missense_variant	MODERATE	GMPR2	ENSG00000100938	1186	725	242	G/D	gGt/gAt	rs34354104	deleterious(0.01)	probably_damaging(1)	31	high
14:24707479-24707479	A	0.041	G	missense_variant	MODERATE	GMPR2	ENSG00000100938	866	725	242	G/D	gGt/gAt	rs34354104	deleterious(0.01)	probably_damaging(1)	31	high
14:24707479-24707479	A	0.041	G	missense_variant	MODERATE	GMPR2	ENSG00000100938	1078	779	260	G/D	gGt/gAt	rs34354104	deleterious(0.01)	probably_damaging(1)	31	high
14:24707479-24707479	A	0.041	G	missense_variant	MODERATE	GMPR2	ENSG00000100938	706	641	214	G/D	gGt/gAt	rs34354104	deleterious(0.01)	probably_damaging(1)	31	high
14:24707479-24707479	A	0.041	G	missense_variant	MODERATE	GMPR2	ENSG00000100938	1056	779	260	G/D	gGt/gAt	rs34354104	deleterious(0.01)	probably_damaging(1)	31	high
14:24707479-24707479	A	0.041	G	missense_variant	MODERATE	GMPR2	ENSG00000100938	305	305	102	G/D	gGt/gAt	rs34354104	deleterious(0.01)	probably_damaging(1)	31	high
14:24707479-24707479	A	0.041	G	missense_variant	MODERATE	GMPR2	ENSG00000100938	621	263	88	G/D	gGt/gAt	rs34354104	deleterious(0.01)	probably_damaging(1)	31	high
14:24707479-24707479	A	0.041	G	missense_variant	MODERATE	GMPR2	ENSG00000100938	933	680	227	G/D	gGt/gAt	rs34354104	deleterious(0.01)	probably_damaging(1)	31	high
14:24707479-24707479	A	0.041	G	missense_variant	MODERATE	GMPR2	ENSG00000100938	1107	725	242	G/D	gGt/gAt	rs34354104	deleterious(0.01)	probably_damaging(1)	31	high
14:24707479-24707479	A	0.041	G	missense_variant	MODERATE	GMPR2	ENSG00000100938	814	626	209	G/D	gGt/gAt	rs34354104	deleterious(0.01)	probably_damaging(1)	31	high
15:40628857-40628857	T	0.010	C	missense_variant	MODERATE	C15orf52	ENSG00000188549	343	307	103	G/R	Ggg/Agg	rs138396559	deleterious(0.03)	probably_damaging(0.975)	25.8	-
15:40628857-40628857	T	0.010	C	missense_variant	MODERATE	C15orf52	ENSG00000188549	953	937	313	G/R	Ggg/Agg	rs138396559	deleterious(0.03)	probably_damaging(0.985)	25.8	-
15:42693865-42693865	T	0.000 (gnomAD exomes)	C	missense_variant	MODERATE	CAPN3	ENSG00000092529	1602	1381	461	R/C	Cgt/Tgt	rs1274808359	deleterious(0)	probably_damaging(1)	32	medium
15:42693865-42693865	T	0.000 (gnomAD exomes)	C	missense_variant	MODERATE	CAPN3	ENSG00000092529	1458	1237	413	R/C	Cgt/Tgt	rs1274808359	deleterious(0)	probably_damaging(1)	32	medium
15:42693865-42693865	T	0.000 (gnomAD exomes)	C	missense_variant	MODERATE	CAPN3	ENSG00000092529	1612	1120	374	R/C	Cgt/Tgt	rs1274808359	deleterious(0)	probably_damaging(0.945)	32	medium
15:42693865-42693865	T	0.000 (gnomAD exomes)	C	missense_variant	MODERATE	CAPN3	ENSG00000092529	1602	1381	461	R/C	Cgt/Tgt	rs1274808359	deleterious(0)	probably_damaging(1)	32	medium
15:42693865-42693865	T	0.000 (gnomAD exomes)	C	missense_variant	MODERATE	CAPN3	ENSG00000092529	1600	1381	461	R/C	Cgt/Tgt	rs1274808359	deleterious(0)	probably_damaging(1)	32	medium
15:44958672-44958672	C	-	G	missense_variant	MODERATE	PATL2	ENSG00000229474	212	212	71	P/R	cCt/cGt	-	deleterious_low_confidence(0)	possibly_damaging(0.908)	-	-
16:12145952-12145952	A	0.000 (gnomAD exomes)	G	missense_variant	MODERATE	SNX29	ENSG00000048471	1066	997	333	G/R	Ggg/Agg	rs780627112	deleterious_low_confidence(0.01)	probably_damaging (1)	31	-
16:12145952-12145952	A	0.000 (gnomAD exomes)	G	missense_variant	MODERATE	SNX29	ENSG00000048471	1066	997	333	G/R	Ggg/Agg	rs780627112	deleterious_low_confidence(0.01)	probably_damaging (1)	31	-
16:27480797-27480797	T	0.033	C	missense_variant	MODERATE	GTF3C1	ENSG00000077235	4905	4889	1630	R/H	cGc/cAc	rs61739285	deleterious(0.04)	probably_damaging(0.932)	25.6	medium
16:27480797-27480797	T	0.033	C	missense_variant	MODERATE	GTF3C1	ENSG00000077235	4912	4889	1630	R/H	cGc/cAc	rs61739285	deleterious(0.04)	probably_damaging(0.973)	25.6	medium
16:30671589-30671589	G	0.000 (gnomAD exomes)	T	missense_variant,NMD_transcript_variant	MODERATE	FBRS	ENSG00000156860	62	63	21	D/E	gaT/gaG	rs1482787358	deleterious(0)	probably_damaging(0.981)	23.0	-
16:57093436-57093436	T	0.023	G	missense_variant	MODERATE	NLRC5	ENSG00000140853	232	234	78	K/N	aaG/aaT	rs117950337	deleterious(0.02)	possibly_damaging(0.878)	20.6	medium
16:58550196-58550196	G	0.001 (gnomAD exomes)	C	missense_variant	MODERATE	SETD6	ENSG00000103037	412	353	118	P/R	cCc/cGc	rs200835277	deleterious(0)	probably_damaging(0.961)	25.0	medium
16:58550196-58550196	G	0.001 (gnomAD exomes)	C	missense_variant	MODERATE	SETD6	ENSG00000103037	409	353	118	P/R	cCc/cGc	rs200835277	deleterious(0)	probably_damaging(0.962)	25.0	medium
16:58550196-58550196	G	0.001 (gnomAD exomes)	C	missense_variant,NMD_transcript_variant	MODERATE	SETD6	ENSG00000103037	398	398	133	P/R	cCc/cGc	rs200835277	deleterious(0)	probably_damaging(0.984)	25.0	medium
16:58550196-58550196	G	0.001 (gnomAD exomes)	C	missense_variant,NMD_transcript_variant	MODERATE	SETD6	ENSG00000103037	395	353	118	P/R	cCc/cGc	rs200835277	deleterious(0)	probably_damaging(0.983)	25.0	medium
16:88951594-88951594	T	0.009	C	missense_variant	MODERATE	CBFA2T3	ENSG00000129993	1374	977	326	R/H	cGc/cAc	rs61757659	deleterious(0.04)	probably_damaging(0.95)	29.5	medium
16:88951594-88951594	T	0.009	C	missense_variant	MODERATE	CBFA2T3	ENSG00000129993	930	719	240	R/H	cGc/cAc	rs61757659	deleterious(0.01)	possibly_damaging(0.855)	29.5	medium
16:88951594-88951594	T	0.009	C	missense_variant	MODERATE	CBFA2T3	ENSG00000129993	1088	719	240	R/H	cGc/cAc	rs61757659	deleterious(0.01)	possibly_damaging(0.855)	29.5	medium
16:88951594-88951594	T	0.009	C	missense_variant	MODERATE	CBFA2T3	ENSG00000129993	935	749	250	R/H	cGc/cAc	rs61757659	deleterious(0.01)	probably_damaging(0.933)	29.5	medium
17:10302911-10302911	A	0.044 (gnomAD exomes)	G	missense_variant	MODERATE	MYH8	ENSG00000133020	3906	3811	1271	R/W	Cgg/Tgg	rs761488980	deleterious(0.01)	probably_damaging(0.993)	28.6	high
17:1674434-1674434	G	0.036	C	missense_variant	MODERATE	SERPINF1	ENSG00000132386	449	356	119	P/R	cCc/cGc	rs1804145	deleterious(0.01)	possibly_damaging(0.886)	22.8	medium
17:3526702-3526702	G	-	A	missense_variant	MODERATE	SHPK	ENSG00000197417	681	578	193	L/P	cTg/cCg	-	deleterious(0.01)	probably_damaging(0.925)	27.4	-
17:3526702-3526702	G	-	A	missense_variant,NMD_transcript_variant	MODERATE	SHPK	ENSG00000262304	608	578	193	L/P	cTg/cCg	-	deleterious(0.01)	probably_damaging(0.925)	27.4	-
17:72248482-72248482	A	0.027	C	missense_variant	MODERATE	TTYH2	ENSG00000141540	1194	1163	388	A/E	gCa/gAa	rs9892705	deleterious(0.01)	possibly_damaging(0.896)	15.38	medium
17:72541030-72541030	C	0.001	T	missense_variant	MODERATE	CD300C	ENSG00000167850	479	118	40	S/G	Agt/Ggt	rs369638601	deleterious(0.01)	possibly_damaging(0.882)	22	medium
17:73016729-73016729	C	0.003	A	missense_variant	MODERATE	ICT1	ENSG00000167862	526	513	171	E/D	gaA/gaC	rs140917471	deleterious(0.03)	probably_damaging(0.992)	23.8	medium
17:73016729-73016729	C	0.003	A	missense_variant	MODERATE	ICT1	ENSG00000167862	551	534	178	E/D	gaA/gaC	rs140917471	deleterious(0.04)	probably_damaging(0.919)	23.8	medium
17:73915803-73915803	A	0.029	G	missense_variant	MODERATE	FBF1	ENSG00000188878	2313	2039	680	A/V	gCg/gTg	rs113062332	deleterious(0)	probably_damaging(0.983)	23.8	medium
17:73915803-73915803	A	0.029	G	missense_variant	MODERATE	FBF1	ENSG00000188878	2316	2042	681	A/V	gCg/gTg	rs113062332	deleterious(0)	probably_damaging(0.959)	23.8	medium
17:79898933-79898933	A	0.045	G	missense_variant	MODERATE	MYADML2	ENSG00000185105	871	685	229	R/W	Cgg/Tgg	rs62077244	deleterious(0)	possibly_damaging(0.861)	27.6	medium
17:79898933-79898933	A	0.045	G	missense_variant	MODERATE	MYADML2	ENSG00000185105	1040	685	229	R/W	Cgg/Tgg	rs62077244	deleterious(0)	possibly_damaging(0.861)	27.6	medium
18:19751604-19751604	C	-	G	missense_variant	MODERATE	GATA6	ENSG00000141448	776	499	167	G/R	Ggc/Cgc	-	deleterious(0)	probably_damaging(0.996)	25.3	-
18:19751604-19751604	C	-	G	missense_variant	MODERATE	GATA6	ENSG00000141448	711	499	167	G/R	Ggc/Cgc	-	deleterious(0)	probably_damaging(0.996)	25.3	-
18:21269831-21269831	T	-	G	missense_variant	MODERATE	LAMA3	ENSG00000053747	425	184	62	A/S	Gcc/Tcc	-	deleterious(0)	probably_damaging(0.998)	26.1	-
18:21269831-21269831	T	-	G	missense_variant	MODERATE	LAMA3	ENSG00000053747	184	184	62	A/S	Gcc/Tcc	-	deleterious(0.01)	probably_damaging(0.958)	26.1	-
18:21269831-21269831	T	-	G	missense_variant	MODERATE	LAMA3	ENSG00000053747	270	184	62	A/S	Gcc/Tcc	-	deleterious(0.05)	probably_damaging(0.998)	26.1	-
18:59828420-59828420	A	0.019	G	missense_variant	MODERATE	PIGN	ENSG00000197563	583	167	56	A/V	gCa/gTa	rs61755362	deleterious(0)	probably_damaging(1)	27.9	medium
18:59828420-59828420	A	0.019	G	missense_variant	MODERATE	PIGN	ENSG00000197563	520	167	56	A/V	gCa/gTa	rs61755362	deleterious(0)	probably_damaging(1)	27.9	medium
18:59828420-59828420	A	0.019	G	missense_variant	MODERATE	PIGN	ENSG00000197563	498	167	56	A/V	gCa/gTa	rs61755362	deleterious(0.05)	probably_damaging(1)	27.9	medium
18:59828420-59828420	A	0.019	G	missense_variant	MODERATE	PIGN	ENSG00000197563	224	167	56	A/V	gCa/gTa	rs61755362	deleterious(0)	probably_damaging(1)	27.9	medium
18:59828420-59828420	A	0.019	G	missense_variant	MODERATE	PIGN	ENSG00000197563	466	167	56	A/V	gCa/gTa	rs61755362	deleterious(0)	probably_damaging(1)	27.9	medium
18:59828420-59828420	A	0.019	G	missense_variant	MODERATE	PIGN	ENSG00000197563	382	167	56	A/V	gCa/gTa	rs61755362	deleterious(0.01)	probably_damaging(1)	27.9	medium
18:59828420-59828420	A	0.019	G	missense_variant	MODERATE	PIGN	ENSG00000197563	446	167	56	A/V	gCa/gTa	rs61755362	deleterious(0.03)	probably_damaging(1)	27.9	medium
18:59828420-59828420	A	0.019	G	missense_variant	MODERATE	PIGN	ENSG00000197563	412	167	56	A/V	gCa/gTa	rs61755362	deleterious(0)	probably_damaging(1)	27.9	medium
18:59828420-59828420	A	0.019	G	missense_variant	MODERATE	PIGN	ENSG00000197563	197	59	20	A/V	gCa/gTa	rs61755362	deleterious(0)	probably_damaging(0.999)	27.9	medium
19:10488926-10488926	T	0.010	C	missense_variant	MODERATE	TYK2	ENSG00000105397	157	157	53	A/T	Gct/Act	rs55762744	deleterious(0)	probably_damaging(0.922)	22.8	medium
19:10488926-10488926	T	0.010	C	missense_variant	MODERATE	TYK2	ENSG00000105397	639	157	53	A/T	Gct/Act	rs55762744	deleterious(0)	probably_damaging(0.922)	22.8	medium
19:10488926-10488926	T	0.010	C	missense_variant	MODERATE	TYK2	ENSG00000105397	488	157	53	A/T	Gct/Act	rs55762744	deleterious(0)	probably_damaging(1)	22.8	medium
19:10488926-10488926	T	0.010	C	missense_variant	MODERATE	TYK2	ENSG00000105397	473	157	53	A/T	Gct/Act	rs55762744	deleterious_low_confidence(0)	probably_damaging(0.996)	22.8	medium
19:10488926-10488926	T	0.010	C	missense_variant	MODERATE	TYK2	ENSG00000105397	445	157	53	A/T	Gct/Act	rs55762744	deleterious(0)	probably_damaging(0.922)	22.8	medium
19:10694295-10694295	C	0.003	T	missense_variant	MODERATE	AP1M2	ENSG00000129354	337	254	85	Y/C	tAt/tGt	rs34276903	deleterious(0.01)	probably_damaging(0.967)	22.9	medium
19:10694295-10694295	C	0.003	T	missense_variant	MODERATE	AP1M2	ENSG00000129354	308	176	59	Y/C	tAt/tGt	rs34276903	deleterious(0)	probably_damaging(0.967)	22.9	medium
19:10694295-10694295	C	0.003	T	missense_variant	MODERATE	AP1M2	ENSG00000129354	338	254	85	Y/C	tAt/tGt	rs34276903	deleterious(0.01)	possibly_damaging(0.879)	22.9	medium
19:10694295-10694295	C	0.003	T	missense_variant	MODERATE	AP1M2	ENSG00000129354	558	494	165	Y/C	tAt/tGt	rs34276903	deleterious(0)	probably_damaging(0.98)	22.9	medium
19:11304167-11304167	A	0.007	G	missense_variant	MODERATE	KANK2	ENSG00000197256	668	589	197	R/W	Cgg/Tgg	rs138305694	deleterious(0)	probably_damaging(0.982)	23.6	medium
19:11304167-11304167	A	0.007	G	missense_variant	MODERATE	KANK2	ENSG00000197256	950	589	197	R/W	Cgg/Tgg	rs138305694	deleterious(0)	probably_damaging(0.957)	23.6	medium
19:11304167-11304167	A	0.007	G	missense_variant	MODERATE	KANK2	ENSG00000197256	904	589	197	R/W	Cgg/Tgg	rs138305694	deleterious(0)	probably_damaging(0.982)	23.6	medium
19:11304167-11304167	A	0.007	G	missense_variant	MODERATE	KANK2	ENSG00000197256	1057	589	197	R/W	Cgg/Tgg	rs138305694	deleterious(0)	probably_damaging(0.957)	23.6	medium
19:11304167-11304167	A	0.007	G	missense_variant	MODERATE	KANK2	ENSG00000197256	589	589	197	R/W	Cgg/Tgg	rs138305694	deleterious(0)	probably_damaging(0.96)	23.6	medium
19:15483906-15483906	T	0.006	C	missense_variant	MODERATE	AKAP8	ENSG00000105127	678	617	206	R/H	cGc/cAc	rs111389458	deleterious(0)	probably_damaging(0.997)	26.3	medium
19:15483906-15483906	T	0.006	C	missense_variant,NMD_transcript_variant	MODERATE	AKAP8	ENSG00000105127	57	59	20	R/H	cGc/cAc	rs111389458	deleterious(0)	probably_damaging(1)	26.3	medium
19:17597640-17597640	G	0.000 (gnomAD exomes)	C	missense_variant	MODERATE	SLC27A1	ENSG00000130304	533	436	146	L/V	Ctg/Gtg	rs1475924156	deleterious(0.01)	probably_damaging(1)	25.5	medium
19:17597640-17597640	G	0.000 (gnomAD exomes)	C	missense_variant	MODERATE	SLC27A1	ENSG00000130304	679	436	146	L/V	Ctg/Gtg	rs1475924156	deleterious(0.01)	probably_damaging(1)	25.5	medium
19:17597640-17597640	G	0.000 (gnomAD exomes)	C	missense_variant,NMD_transcript_variant	MODERATE	SLC27A1	ENSG00000130304	679	436	146	L/V	Ctg/Gtg	rs1475924156	deleterious(0)	probably_damaging(1)	25.5	medium
19:17597640-17597640	G	0.000 (gnomAD exomes)	C	missense_variant,NMD_transcript_variant	MODERATE	SLC27A1	ENSG00000130304	439	436	146	L/V	Ctg/Gtg	rs1475924156	deleterious(0)	probably_damaging(1)	25.5	medium
19:18119848-18119848	A	0.000	G	missense_variant	MODERATE	ARRDC2	ENSG00000105643	553	410	137	R/Q	cGg/cAg	rs1046806	deleterious(0.02)	probably_damaging(0.999)	30	medium
19:18119848-18119848	A	0.000	G	missense_variant	MODERATE	ARRDC2	ENSG00000105643	578	395	132	R/Q	cGg/cAg	rs1046806	deleterious(0.01)	probably_damaging(0.999)	30	medium
19:18119848-18119848	A	0.000	G	missense_variant	MODERATE	ARRDC2	ENSG00000105643	679	536	179	R/Q	cGg/cAg	rs1046806	deleterious(0)	probably_damaging(0.987)	30	medium
19:35843242-35843242	C	0.000 (gnomAD genomes)	T	missense_variant	MODERATE	FFAR1	ENSG00000126266	798	788	263	I/T	aTc/aCc	rs1026433053	deleterious(0.01)	probably_damaging(0.909)	25.5	medium
19:38876586-38876586	T	0.036	G	missense_variant	MODERATE	GGN	ENSG00000179168	1449	1316	439	P/Q	cCg/cAg	rs112138627	deleterious_low_confidence(0.01)	probably_damaging(0.943)	18.20	medium
19:38876586-38876586	T	0.036	G	missense_variant,NMD_transcript_variant	MODERATE	GGN	ENSG00000179168	1191	1067	356	P/Q	cCg/cAg	rs112138627	deleterious_low_confidence(0.01)	possibly_damaging(0.905)	18.20	medium
19:40581579-40581579	A	0.012	G	missense_variant	MODERATE	ZNF780A	ENSG00000197782	1073	770	257	S/F	tCc/tTc	rs151054195	deleterious(0.01)	possibly_damaging(0.808)	20.3	medium
19:40581579-40581579	A	0.012	G	missense_variant	MODERATE	ZNF780A	ENSG00000197782	980	668	223	S/F	tCc/tTc	rs151054195	deleterious(0.02)	possibly_damaging(0.808)	20.3	medium
19:40581579-40581579	A	0.012	G	missense_variant	MODERATE	ZNF780A	ENSG00000197782	921	773	258	S/F	tCc/tTc	rs151054195	deleterious(0.01)	probably_damaging(0.943)	20.3	medium
19:40581579-40581579	A	0.012	G	missense_variant	MODERATE	ZNF780A	ENSG00000197782	888	773	258	S/F	tCc/tTc	rs151054195	deleterious(0.01)	probably_damaging(0.943)	20.3	medium
19:40581579-40581579	A	0.012	G	missense_variant	MODERATE	ZNF780A	ENSG00000197782	980	770	257	S/F	tCc/tTc	rs151054195	deleterious(0.01)	possibly_damaging(0.808)	20.3	medium
19:4538367-4538367	A	0.044 (gnomAD exomes)	C	missense_variant	MODERATE	LRG1	ENSG00000171236	1090	629	210	G/V	gGt/gTt	rs767041022	deleterious(0)	probably_damaging(0.997)	22.9	medium
19:48821757-48821757	A	0.025	G	missense_variant	MODERATE	CCDC114	ENSG00000105479	819	136	46	R/W	Cgg/Tgg	rs16981988	deleterious(0)	probably_damaging(0.999)	23.8	medium
19:49079307-49079307	A	0.000 (gnomAD exomes)	G	missense_variant	MODERATE	SULT2B1	ENSG00000088002	359	181	61	D/N	Gac/Aac	rs146090633	deleterious(0.01)	probably_damaging(0.949)	25	medium
19:49079307-49079307	A	0.000 (gnomAD exomes)	G	missense_variant	MODERATE	SULT2B1	ENSG00000088002	511	136	46	D/N	Gac/Aac	rs146090633	deleterious(0.01)	probably_damaging(0.946)	25	medium
19:49318380-49318380	A	0.043	G	missense_variant	MODERATE	HSD17B14	ENSG00000087076	655	388	130	R/W	Cgg/Tgg	rs35299026	deleterious(0)	probably_damaging(1)	26.9	-
19:49318380-49318380	A	0.043	G	missense_variant	MODERATE	HSD17B14	ENSG00000087076	280	280	94	R/W	Cgg/Tgg	rs35299026	deleterious(0)	probably_damaging(1)	26.9	-
19:49318380-49318380	A	0.043	G	missense_variant	MODERATE	HSD17B14	ENSG00000087076	415	316	106	R/W	Cgg/Tgg	rs35299026	deleterious(0)	probably_damaging(0.999)	26.9	-
19:50747534-50747534	T	0.006	G	missense_variant	MODERATE	MYH14	ENSG00000105357	1157	1150	384	G/C	Ggc/Tgc	rs119103280	deleterious(0)	probably_damaging(0.977)	24.5	high
19:50747534-50747534	T	0.006	G	missense_variant	MODERATE	MYH14	ENSG00000105357	1173	1126	376	G/C	Ggc/Tgc	rs119103280	deleterious(0)	probably_damaging(1)	24.5	high
19:50747534-50747534	T	0.006	G	missense_variant	MODERATE	MYH14	ENSG00000105357	1197	1150	384	G/C	Ggc/Tgc	rs119103280	deleterious(0)	probably_damaging(0.99)	24.5	high
19:50747534-50747534	T	0.006	G	missense_variant	MODERATE	MYH14	ENSG00000105357	1197	1150	384	G/C	Ggc/Tgc	rs119103280	deleterious(0)	probably_damaging(1)	24.5	high
19:50747534-50747534	T	0.006	G	missense_variant	MODERATE	MYH14	ENSG00000105357	1126	1126	376	G/C	Ggc/Tgc	rs119103280	deleterious(0)	probably_damaging(0.994)	24.5	high
19:50747534-50747534	T	0.006	G	missense_variant	MODERATE	MYH14	ENSG00000105357	1275	1150	384	G/C	Ggc/Tgc	rs119103280	deleterious(0)	probably_damaging(0.99)	24.5	high
19:50747534-50747534	T	0.006	G	missense_variant	MODERATE	MYH14	ENSG00000105357	1188	1150	384	G/C	Ggc/Tgc	rs119103280	deleterious(0)	probably_damaging(0.99)	24.5	high
19:50747534-50747534	T	0.006	G	missense_variant	MODERATE	MYH14	ENSG00000105357	1180	1150	384	G/C	Ggc/Tgc	rs119103280	deleterious(0)	probably_damaging(0.977)	24.5	high
19:51563265-51563265	A	0.030	G	missense_variant	MODERATE	KLK13	ENSG00000167759	368	325	109	H/Y	Cac/Tac	rs34089525	deleterious(0.01)	probably_damaging(0.979)	21.7	medium
19:53454387-53454387	C	0.027	G	missense_variant	MODERATE	ZNF816	ENSG00000180257	942	641	214	S/C	tCt/tGt	rs57088011	deleterious(0.01)	probably_damaging(0.988)	17.54	medium
19:53454387-53454387	C	0.027	G	missense_variant	MODERATE	ZNF816	ENSG00000180257	812	641	214	S/C	tCt/tGt	rs57088011	deleterious(0.01)	probably_damaging(0.988)	17.54	medium
19:56717520-56717520	G	0.000 (gnomAD exomes)	A	missense_variant	MODERATE	ZSCAN5C	ENSG00000204532	238	238	80	K/E	Aaa/Gaa	rs757962748	deleterious(0.01)	possibly_damaging(0.879)	23.4	-
19:56717520-56717520	G	0.000 (gnomAD exomes)	A	missense_variant	MODERATE	ZSCAN5C	ENSG00000204532	387	238	80	K/E	Aaa/Gaa	rs757962748	deleterious(0.01)	possibly_damaging(0.879)	23.4	-
19:58118418-58118418	T	0.024	C	missense_variant	MODERATE	ZNF530	ENSG00000183647	1745	1525	509	H/Y	Cac/Tac	rs62126240	deleterious(0)	probably_damaging(1)	22.1	high
19:58118418-58118418	T	0.024	C	missense_variant,NMD_transcript_variant	MODERATE	ZNF530	ENSG00000183647	1745	1525	509	H/Y	Cac/Tac	rs62126240	deleterious(0)	probably_damaging(1)	22.1	high
19:9362501-9362501	T	0.001 (gnomAD exomes)	C	missense_variant	MODERATE	OR7E24	ENSG00000237521	896	782	261	S/F	tCt/tTt	rs199799172	deleterious(0)	probably_damaging(0.975)	23.9	high
19:9449888-9449888	G	0.037	A	missense_variant	MODERATE	ZNF559	ENSG00000188321	315	53	18	D/G	gAt/gGt	rs77267061	deleterious(0)	probably_damaging(0.999)	25.8	high
19:9449888-9449888	G	0.037	A	missense_variant	MODERATE	ZNF559	ENSG00000188321	701	53	18	D/G	gAt/gGt	rs77267061	deleterious(0.01)	probably_damaging(0.99)	25.8	high
19:9449888-9449888	G	0.037	A	missense_variant	MODERATE	ZNF559	ENSG00000188321	245	53	18	D/G	gAt/gGt	rs77267061	deleterious(0)	probably_damaging(0.999)	25.8	high
19:9449888-9449888	G	0.037	A	missense_variant	MODERATE	ZNF559	ENSG00000188321	467	137	46	D/G	gAt/gGt	rs77267061	deleterious(0)	probably_damaging(1)	25.8	high
19:9449888-9449888	G	0.037	A	missense_variant	MODERATE	ZNF559	ENSG00000188321	652	245	82	D/G	gAt/gGt	rs77267061	deleterious(0)	probably_damaging(0.998)	25.8	high
19:9449888-9449888	G	0.037	A	missense_variant	MODERATE	ZNF559	ENSG00000188321	695	137	46	D/G	gAt/gGt	rs77267061	deleterious(0)	probably_damaging(1)	25.8	high
19:9449888-9449888	G	0.037	A	missense_variant	MODERATE	ZNF559	ENSG00000188321	437	53	18	D/G	gAt/gGt	rs77267061	deleterious(0)	probably_damaging(0.99)	25.8	high
19:9449888-9449888	G	0.037	A	missense_variant	MODERATE	ZNF559	ENSG00000188321	308	53	18	D/G	gAt/gGt	rs77267061	deleterious(0)	probably_damaging(0.999)	25.8	high
19:9449888-9449888	G	0.037	A	missense_variant	MODERATE	ZNF559	ENSG00000188321	449	137	46	D/G	gAt/gGt	rs77267061	deleterious(0)	probably_damaging(0.996)	25.8	high
19:9449888-9449888	G	0.037	A	missense_variant	MODERATE	ZNF559	ENSG00000188321	227	53	18	D/G	gAt/gGt	rs77267061	deleterious(0.01)	probably_damaging(0.99)	25.8	high
19:9449888-9449888	G	0.037	A	missense_variant,NMD_transcript_variant	MODERATE	ZNF559-ZNF177	ENSG00000270011	241	53	18	D/G	gAt/gGt	rs77267061	deleterious(0)	probably_damaging(1)	25.8	high
19:9449888-9449888	G	0.037	A	missense_variant,NMD_transcript_variant	MODERATE	ZNF559-ZNF177	ENSG00000270011	305	53	18	D/G	gAt/gGt	rs77267061	deleterious(0)	probably_damaging(0.997)	25.8	high
1:115829178-115829178	T	0.012	C	missense_variant	MODERATE	NGF	ENSG00000134259	408	239	80	R/Q	cGg/cAg	rs11466111	deleterious(0.01)	possibly_damaging(0.9)	26.3	medium
1:11766493-11766493	T	0.003	C	missense_variant	MODERATE	DRAXIN	ENSG00000162490	313	178	60	R/W	Cgg/Tgg	rs202026446	deleterious(0)	probably_damaging(0.996)	24.0	medium
1:155028692-155028692	T	0.003	C	missense_variant	MODERATE	ADAM15	ENSG00000143537	962	881	294	P/L	cCt/cTt	rs2306122	deleterious(0)	probably_damaging(0.99)	25.8	medium
1:155028692-155028692	T	0.003	C	missense_variant	MODERATE	ADAM15	ENSG00000143537	982	881	294	P/L	cCt/cTt	rs2306122	deleterious(0)	probably_damaging(1)	25.8	medium
1:155028692-155028692	T	0.003	C	missense_variant	MODERATE	ADAM15	ENSG00000143537	982	881	294	P/L	cCt/cTt	rs2306122	deleterious(0)	probably_damaging(1)	25.8	medium
1:155028692-155028692	T	0.003	C	missense_variant	MODERATE	ADAM15	ENSG00000143537	982	881	294	P/L	cCt/cTt	rs2306122	deleterious(0)	probably_damaging(1)	25.8	medium
1:155028692-155028692	T	0.003	C	missense_variant	MODERATE	ADAM15	ENSG00000143537	982	881	294	P/L	cCt/cTt	rs2306122	deleterious(0)	probably_damaging(1)	25.8	medium
1:155028692-155028692	T	0.003	C	missense_variant	MODERATE	ADAM15	ENSG00000143537	982	881	294	P/L	cCt/cTt	rs2306122	deleterious(0)	probably_damaging(0.92)	25.8	medium
1:155028692-155028692	T	0.003	C	missense_variant	MODERATE	ADAM15	ENSG00000143537	868	833	278	P/L	cCt/cTt	rs2306122	deleterious(0)	probably_damaging(0.978)	25.8	medium
1:155028692-155028692	T	0.003	C	missense_variant	MODERATE	ADAM15	ENSG00000143537	982	881	294	P/L	cCt/cTt	rs2306122	deleterious(0)	probably_damaging(1)	25.8	medium
1:155028692-155028692	T	0.003	C	missense_variant	MODERATE	ADAM15	ENSG00000143537	947	911	304	P/L	cCt/cTt	rs2306122	deleterious(0)	probably_damaging(1)	25.8	medium
1:155028692-155028692	T	0.003	C	missense_variant,NMD_transcript_variant	MODERATE	ADAM15	ENSG00000143537	982	881	294	P/L	cCt/cTt	rs2306122	deleterious(0)	probably_damaging(1)	25.8	medium
1:155028692-155028692	T	0.003	C	missense_variant,NMD_transcript_variant	MODERATE	ADAM15	ENSG00000143537	982	881	294	P/L	cCt/cTt	rs2306122	deleterious(0)	probably_damaging(1)	25.8	medium
1:155148520-155148520	A	0.024	G	missense_variant	MODERATE	TRIM46	ENSG00000163462	482	482	161	R/H	cGc/cAc	rs80254867	deleterious(0)	probably_damaging(0.99)	25.7	medium
1:155148520-155148520	A	0.024	G	missense_variant	MODERATE	TRIM46	ENSG00000163462	550	413	138	R/H	cGc/cAc	rs80254867	deleterious(0)	probably_damaging(0.99)	25.7	medium
1:155148520-155148520	A	0.024	G	missense_variant	MODERATE	TRIM46	ENSG00000163462	549	482	161	R/H	cGc/cAc	rs80254867	deleterious(0)	probably_damaging(0.99)	25.7	medium
1:155148520-155148520	A	0.024	G	missense_variant	MODERATE	TRIM46	ENSG00000163462	571	482	161	R/H	cGc/cAc	rs80254867	deleterious(0)	probably_damaging(0.977)	25.7	medium
1:155148520-155148520	A	0.024	G	missense_variant	MODERATE	TRIM46	ENSG00000163462	565	482	161	R/H	cGc/cAc	rs80254867	deleterious(0)	probably_damaging(0.988)	25.7	medium
1:155148520-155148520	A	0.024	G	missense_variant	MODERATE	TRIM46	ENSG00000163462	506	503	168	R/H	cGc/cAc	rs80254867	deleterious(0)	probably_damaging(0.985)	25.7	medium
1:155148520-155148520	A	0.024	G	missense_variant	MODERATE	TRIM46	ENSG00000163462	308	104	35	R/H	cGc/cAc	rs80254867	deleterious(0)	probably_damaging(0.99)	25.7	medium
1:16918457-16918457	C	0.009 (gnomAD)	G	missense_variant	MODERATE	NBPF1	ENSG00000219481	948	60	20	I/M	atC/atG	rs9730080	deleterious(0)	possibly_damaging(0.844)	14.95	-
1:16918457-16918457	C	0.009 (gnomAD)	G	missense_variant,NMD_transcript_variant	MODERATE	NBPF1	ENSG00000219481	518	60	20	I/M	atC/atG	rs9730080	deleterious(0)	probably_damaging(0.988)	14.95	-
1:177929501-177929501	G	0.029	C	missense_variant	MODERATE	SEC16B	ENSG00000120341	1064	974	325	R/T	aGa/aCa	rs34246968	deleterious(0)	probably_damaging(0.949)	26.1	medium
1:177929501-177929501	G	0.029	C	missense_variant	MODERATE	SEC16B	ENSG00000120341	1059	977	326	R/T	aGa/aCa	rs34246968	deleterious(0)	probably_damaging(1)	26.1	medium
1:202710733-202710733	G	0.039	C	missense_variant	MODERATE	KDM5B	ENSG00000117139	2826	2233	745	E/Q	Gaa/Caa	rs112284833	deleterious(0.02)	possibly_damaging(0.908)	26.9	medium
1:202710733-202710733	G	0.039	C	missense_variant	MODERATE	KDM5B	ENSG00000117139	3872	2707	903	E/Q	Gaa/Caa	rs112284833	deleterious(0.01)	possibly_damaging(0.908)	26.9	medium
1:203008236-203008236	A	0.013	C	missense_variant	MODERATE	PPFIA4	ENSG00000143847	627	100	34	L/M	Ctg/Atg	rs79483487	deleterious(0)	probably_damaging(0.997)	24.6	medium
1:203008236-203008236	A	0.013	C	missense_variant	MODERATE	PPFIA4	ENSG00000143847	541	100	34	L/M	Ctg/Atg	rs79483487	deleterious(0)	probably_damaging(1)	24.6	medium
1:204378846-204378846	A	0.000 (gnomAD)	G	missense_variant	MODERATE	PPP1R15B	ENSG00000158615	2074	1694	565	P/L	cCc/cTc	rs147451458	deleterious(0)	probably_damaging(1)	28.8	-
1:207646222-207646222	A	0.002	G	missense_variant	MODERATE	CR2	ENSG00000117322	1865	1676	559	G/E	gGg/gAg	rs143614333	deleterious(0)	probably_damaging(0.967)	24.0	medium
1:207646222-207646222	A	0.002	G	missense_variant	MODERATE	CR2	ENSG00000117322	1865	1676	559	G/E	gGg/gAg	rs143614333	deleterious(0.01)	probably_damaging(0.992)	24.0	medium
1:207646222-207646222	A	0.002	G	missense_variant	MODERATE	CR2	ENSG00000117322	1865	1676	559	G/E	gGg/gAg	rs143614333	deleterious(0)	probably_damaging(0.992)	24.0	medium
1:207646222-207646222	A	0.002	G	missense_variant	MODERATE	CR2	ENSG00000117322	1649	1595	532	G/E	gGg/gAg	rs143614333	deleterious(0)	probably_damaging(0.928)	24.0	medium
1:227935835-227935835	A	0.002	T	missense_variant	MODERATE	SNAP47	ENSG00000143740	947	533	178	L/Q	cTg/cAg	rs149727487	deleterious(0)	probably_damaging(0.956)	24.1	medium
1:227935835-227935835	A	0.002	T	missense_variant	MODERATE	SNAP47	ENSG00000143740	947	533	178	L/Q	cTg/cAg	rs149727487	deleterious(0)	probably_damaging(0.925)	24.1	medium
1:227935835-227935835	A	0.002	T	missense_variant	MODERATE	SNAP47	ENSG00000143740	507	509	170	L/Q	cTg/cAg	rs149727487	deleterious(0)	probably_damaging(0.979)	24.1	medium
1:227935835-227935835	A	0.002	T	missense_variant	MODERATE	SNAP47	ENSG00000143740	72	74	25	L/Q	cTg/cAg	rs149727487	deleterious(0)	possibly_damaging(0.894)	24.1	medium
1:228469801-228469801	C	0.026	G	missense_variant	MODERATE	OBSCN	ENSG00000154358	8439	8365	2789	G/R	Ggc/Cgc	rs150312546	deleterious(0)	probably_damaging(1)	24.4	medium
1:228469801-228469801	C	0.026	G	missense_variant	MODERATE	OBSCN	ENSG00000154358	4906	4906	1636	G/R	Ggc/Cgc	rs150312546	deleterious(0)	probably_damaging(1)	24.4	medium
1:228469801-228469801	C	0.026	G	missense_variant	MODERATE	OBSCN	ENSG00000154358	1909	1909	637	G/R	Ggc/Cgc	rs150312546	deleterious(0)	probably_damaging(0.987)	24.4	medium
1:228469801-228469801	C	0.026	G	missense_variant	MODERATE	OBSCN	ENSG00000154358	8409	8365	2789	G/R	Ggc/Cgc	rs150312546	deleterious(0)	probably_damaging(1)	24.4	medium
1:228469801-228469801	C	0.026	G	missense_variant	MODERATE	OBSCN	ENSG00000154358	192	193	65	G/R	Ggc/Cgc	rs150312546	deleterious(0)	probably_damaging(1)	24.4	medium
1:228469801-228469801	C	0.026	G	missense_variant	MODERATE	OBSCN	ENSG00000154358	9726	9652	3218	G/R	Ggc/Cgc	rs150312546	deleterious(0)	probably_damaging(0.996)	24.4	medium
1:247886493-247886493	A	0.044	G	missense_variant	MODERATE	OR14A2	ENSG00000241128	853	853	285	P/S	Cct/Tct	rs62619787	deleterious(0)	probably_damaging(0.998)	19.95	-
1:27697423-27697423	T	0.000	C	missense_variant	MODERATE	FCN3	ENSG00000142748	440	434	145	R/H	cGc/cAc	rs201580290	deleterious(0.01)	probably_damaging(0.996)	19.27	high
1:27697423-27697423	T	0.000	C	missense_variant	MODERATE	FCN3	ENSG00000142748	407	401	134	R/H	cGc/cAc	rs201580290	deleterious(0.01)	probably_damaging(0.994)	19.27	high
1:43217988-43217988	T	0.026 (gnomAD)	G	missense_variant	MODERATE	LEPRE1	ENSG00000117385	1567	1526	509	P/H	cCc/cAc	rs375305175	deleterious(0)	possibly_damaging(0.9)	24.8	medium
1:43217988-43217988	T	0.026 (gnomAD)	G	missense_variant	MODERATE	LEPRE1	ENSG00000117385	1639	1526	509	P/H	cCc/cAc	rs375305175	deleterious(0)	probably_damaging(0.914)	24.8	medium
1:43217988-43217988	T	0.026 (gnomAD)	G	missense_variant	MODERATE	LEPRE1	ENSG00000117385	300	302	101	P/H	cCc/cAc	rs375305175	deleterious(0)	probably_damaging(0.957)	24.8	medium
1:43217988-43217988	T	0.026 (gnomAD)	G	missense_variant,NMD_transcript_variant	MODERATE	LEPRE1	ENSG00000117385	348	350	117	P/H	cCc/cAc	rs375305175	deleterious(0.02)	probably_damaging(0.986)	24.8	medium
1:45798475-45798475	C	0.000	T	missense_variant	MODERATE	MUTYH	ENSG00000132781	566	455	152	Y/C	tAc/tGc	rs34612342	deleterious(0)	probably_damaging(1)	26.1	high
1:45798475-45798475	C	0.000	T	missense_variant	MODERATE	MUTYH	ENSG00000132781	598	452	151	Y/C	tAc/tGc	rs34612342	deleterious(0)	probably_damaging(1)	26.1	high
1:45798475-45798475	C	0.000	T	missense_variant	MODERATE	MUTYH	ENSG00000132781	661	527	176	Y/C	tAc/tGc	rs34612342	deleterious(0)	probably_damaging(1)	26.1	high
1:45798475-45798475	C	0.000	T	missense_variant	MODERATE	MUTYH	ENSG00000132781	631	485	162	Y/C	tAc/tGc	rs34612342	deleterious(0)	probably_damaging(1)	26.1	high
1:45798475-45798475	C	0.000	T	missense_variant	MODERATE	MUTYH	ENSG00000132781	645	452	151	Y/C	tAc/tGc	rs34612342	deleterious(0)	probably_damaging(1)	26.1	high
1:45798475-45798475	C	0.000	T	missense_variant	MODERATE	MUTYH	ENSG00000132781	631	497	166	Y/C	tAc/tGc	rs34612342	deleterious(0)	probably_damaging(1)	26.1	high
1:45798475-45798475	C	0.000	T	missense_variant	MODERATE	MUTYH	ENSG00000132781	710	494	165	Y/C	tAc/tGc	rs34612342	deleterious(0)	probably_damaging(1)	26.1	high
1:45798475-45798475	C	0.000	T	missense_variant	MODERATE	MUTYH	ENSG00000132781	195	68	23	Y/C	tAc/tGc	rs34612342	deleterious(0)	probably_damaging(1)	26.1	high
1:45798475-45798475	C	0.000	T	missense_variant	MODERATE	MUTYH	ENSG00000132781	516	485	162	Y/C	tAc/tGc	rs34612342	deleterious(0)	probably_damaging(1)	26.1	high
1:45798475-45798475	C	0.000	T	missense_variant	MODERATE	MUTYH	ENSG00000132781	528	485	162	Y/C	tAc/tGc	rs34612342	deleterious(0)	probably_damaging(1)	26.1	high
1:45798475-45798475	C	0.000	T	missense_variant	MODERATE	MUTYH	ENSG00000132781	752	536	179	Y/C	tAc/tGc	rs34612342	deleterious(0)	probably_damaging(1)	26.1	high
1:45798475-45798475	C	0.000	T	missense_variant	MODERATE	MUTYH	ENSG00000132781	514	452	151	Y/C	tAc/tGc	rs34612342	deleterious(0)	probably_damaging(1)	26.1	high
1:45798475-45798475	C	0.000	T	missense_variant	MODERATE	MUTYH	ENSG00000132781	548	494	165	Y/C	tAc/tGc	rs34612342	deleterious(0)	probably_damaging(1)	26.1	high
1:46726525-46726525	T	0.009	C	missense_variant	MODERATE	RAD54L	ENSG00000085999	1278	604	202	R/C	Cgc/Tgc	rs28363218	deleterious(0)	probably_damaging(0.976)	31	medium
1:46726525-46726525	T	0.009	C	missense_variant	MODERATE	RAD54L	ENSG00000085999	718	604	202	R/C	Cgc/Tgc	rs28363218	deleterious(0)	probably_damaging(0.976)	31	medium
1:46726525-46726525	T	0.009	C	missense_variant	MODERATE	RAD54L	ENSG00000085999	644	604	202	R/C	Cgc/Tgc	rs28363218	deleterious(0)	probably_damaging(0.976)	31	medium
1:47834209-47834209	T	0.049	G	missense_variant,NMD_transcript_variant	MODERATE	CMPK1	ENSG00000162368	377	240	80	Q/H	caG/caT	rs35687416	deleterious(0)	probably_damaging(0.925)	23.3	-
1:4832437-4832437	T	0.000 (gnomAD)	C	missense_variant	MODERATE	AJAP1	ENSG00000196581	1709	1015	339	R/W	Cgg/Tgg	rs779756465	deleterious(0)	probably_damaging(0.997)	31	medium
1:4832437-4832437	T	0.000 (nomAD)	C	missense_variant	MODERATE	AJAP1	ENSG00000196581	1396	1015	339	R/W	Cgg/Tgg	rs779756465	deleterious(0)	probably_damaging(0.997)	31	medium
1:65312368-65312368	T	0.003	C	missense_variant	MODERATE	JAK1	ENSG00000162434	2200	1951	651	V/M	Gtg/Atg	rs149968614	deleterious(0.01)	probably_damaging(0.98)	26.5	medium
20:1293141-1293141	T	0.022	C	missense_variant	MODERATE	SDCBP2	ENSG00000125775	631	572	191	R/Q	cGg/cAg	rs35367003	deleterious(0.03)	probably_damaging(0.913)	32	medium
20:1293141-1293141	T	0.022	C	missense_variant	MODERATE	SDCBP2	ENSG00000125775	746	572	191	R/Q	cGg/cAg	rs35367003	deleterious(0.03)	probably_damaging(0.913)	32	medium
20:1293141-1293141	T	0.022	C	missense_variant	MODERATE	SDCBP2	ENSG00000125775	522	317	106	R/Q	cGg/cAg	rs35367003	deleterious(0.03)	probably_damaging(0.913)	32	medium
20:1293141-1293141	T	0.022	C	missense_variant	MODERATE	SDCBP2	ENSG00000125775	711	572	191	R/Q	cGg/cAg	rs35367003	deleterious(0.03)	probably_damaging(0.913)	32	medium
20:34207531-34207531	A	0.000	T	missense_variant	MODERATE	SPAG4	ENSG00000061656	1052	940	314	F/I	Ttt/Att	rs569605887	deleterious(0)	probably_damaging(0.998)	28.2	medium
20:34207531-34207531	A	0.000	T	missense_variant	MODERATE	SPAG4	ENSG00000061656	748	565	189	F/I	Ttt/Att	rs569605887	deleterious(0)	probably_damaging(0.998)	28.2	medium
20:36982811-36982811	A	0.013	G	missense_variant	MODERATE	LBP	ENSG00000129988	657	496	166	V/M	Gtg/Atg	rs5744204	deleterious(0.02)	probably_damaging(0.933)	17.11	medium
21:45033807-45033807	T	0.018 (gnomAD)	C	missense_variant	MODERATE	HSF2BP	ENSG00000160207	928	596	199	G/D	gGt/gAt	rs748014036	deleterious(0)	probably_damaging(1)	28.0	medium
21:45033807-45033807	T	0.018 (gnomAD)	C	missense_variant	MODERATE	HSF2BP	ENSG00000160207	914	605	202	G/D	gGt/gAt	rs748014036	deleterious(0)	probably_damaging(1)	28.0	medium
21:45033807-45033807	T	0.018 (gnomAD)	C	missense_variant	MODERATE	HSF2BP	ENSG00000160207	493	371	124	G/D	gGt/gAt	rs748014036	deleterious(0)	probably_damaging(1)	28.0	medium
22:17586757-17586757	C	0.004	T	missense_variant	MODERATE	IL17RA	ENSG00000177663	1091	958	320	W/R	Tgg/Cgg	rs140221307	deleterious(0)	probably_damaging(0.972)	24.9	medium
22:22698031-22698031	A	0.007	G	missense_variant	MODERATE	IGLV9-49	ENSG00000223350	356	319	107	E/K	Gag/Aag	rs148899698	deleterious(0.01)	probably_damaging(0.917)	22.9	-
22:30857329-30857329	A	0.001	T	missense_variant	MODERATE	SEC14L3	ENSG00000100012	1156	872	291	D/V	gAt/gTt	rs114566165	deleterious(0)	probably_damaging(0.941)	25.7	high
22:30857329-30857329	A	0.001	T	missense_variant	MODERATE	SEC14L3	ENSG00000100012	998	872	291	D/V	gAt/gTt	rs114566165	deleterious(0)	probably_damaging(0.941)	25.7	high
22:35730426-35730426	T	0.005	C	missense_variant	MODERATE	TOM1	ENSG00000100284	1258	1133	378	A/V	gCt/gTt	rs146200939	deleterious(0.02)	probably_damaging(0.928)	31	medium
22:35730426-35730426	T	0.005	C	missense_variant	MODERATE	TOM1	ENSG00000100284	1118	1019	340	A/V	gCt/gTt	rs146200939	deleterious(0.02)	possibly_damaging(0.848)	31	medium
22:35730426-35730426	T	0.005	C	missense_variant	MODERATE	TOM1	ENSG00000100284	1185	1034	345	A/V	gCt/gTt	rs146200939	deleterious(0.02)	probably_damaging(0.928)	31	medium
22:38978386-38978386	T	0.001	G	missense_variant	MODERATE	FAM227A	ENSG00000184949	2531	1909	637	L/I	Ctc/Atc	rs201130316	deleterious_low_confidence(0)	possibly_damaging(0.807)	16.70	-
22:39441093-39441093	A	0.005	C	missense_variant	MODERATE	APOBEC3F	ENSG00000128394	676	319	107	L/M	Ctg/Atg	rs141173351	deleterious(0)	probably_damaging(0.998)	14.10	high
22:50664526-50664526	G	0.009 (gnomAD)	A	missense_variant	MODERATE	TUBGCP6	ENSG00000128159	1891	1786	596	Y/H	Tac/Cac	rs746350849	deleterious(0)	probably_damaging(0.999)	25.1	medium
22:50664526-50664526	G	0.009 (gnomAD)	A	missense_variant	MODERATE	TUBGCP6	ENSG00000128159	2279	1786	596	Y/H	Tac/Cac	rs746350849	deleterious(0)	probably_damaging(0.999)	25.1	medium
2:152432811-152432811	T	0.002	A	missense_variant	MODERATE	NEB	ENSG00000183091	11807	11659	3887	S/T	Tct/Act	rs35227368	deleterious(0.05)	probably_damaging(0.986)	23.2	medium
2:152432811-152432811	T	0.002	A	missense_variant	MODERATE	NEB	ENSG00000183091	11862	11659	3887	S/T	Tct/Act	rs35227368	deleterious(0.05)	possibly_damaging(0.9)	23.2	medium
2:152432811-152432811	T	0.002	A	missense_variant	MODERATE	NEB	ENSG00000183091	952	952	318	S/T	Tct/Act	rs35227368	deleterious(0)	probably_damaging(0.993)	23.2	medium
2:178545566-178545566	T	0.025	C	missense_variant	MODERATE	PDE11A	ENSG00000128655	2729	2411	804	R/H	cGt/cAt	rs75127279	deleterious(0)	probably_damaging(0.918)	31	medium
2:178545566-178545566	T	0.025	C	missense_variant	MODERATE	PDE11A	ENSG00000128655	1229	1079	360	R/H	cGt/cAt	rs75127279	deleterious(0)	probably_damaging(0.918)	31	medium
2:178545566-178545566	T	0.025	C	missense_variant	MODERATE	PDE11A	ENSG00000128655	1428	1337	446	R/H	cGt/cAt	rs75127279	deleterious(0)	probably_damaging(0.918)	31	medium
2:178545566-178545566	T	0.025	C	missense_variant	MODERATE	PDE11A	ENSG00000128655	1470	1337	446	R/H	cGt/cAt	rs75127279	deleterious(0)	probably_damaging(0.918)	31	medium
2:179641543-179641543	T	0.000	C	missense_variant	MODERATE	TTN	ENSG00000155657	5271	5048	1683	R/Q	cGa/cAa	rs368122582	deleterious(0.01)	probably_damaging(0.999)	23.1	-
2:20424573-20424573	A	0.038	G	missense_variant	MODERATE	SDC1	ENSG00000115884	285	56	19	P/L	cCg/cTg	rs59231157	deleterious_low_confidence(0.05)	possibly_damaging(0.831)	22.4	medium
2:205986386-205986386	A	0.026 (gnomAD)	G	missense_variant	MODERATE	PARD3B	ENSG00000116117	878	878	293	R/H	cGt/cAt	rs747823104	deleterious(0)	probably_damaging(0.996)	25.9	medium
2:205986386-205986386	A	0.026 (gnomAD)	G	missense_variant	MODERATE	PARD3B	ENSG00000116117	878	878	293	R/H	cGt/cAt	rs747823104	deleterious(0)	probably_damaging(0.943)	25.9	medium
2:205986386-205986386	A	0.026 (gnomAD)	G	missense_variant	MODERATE	PARD3B	ENSG00000116117	878	878	293	R/H	cGt/cAt	rs747823104	deleterious(0)	probably_damaging(0.996)	25.9	medium
2:205986386-205986386	A	0.026 (gnomAD)	G	missense_variant	MODERATE	PARD3B	ENSG00000116117	1085	878	293	R/H	cGt/cAt	rs747823104	deleterious(0)	probably_damaging(0.998)	25.9	medium
2:205986386-205986386	A	0.026 (gnomAD)	G	missense_variant	MODERATE	PARD3B	ENSG00000116117	1038	878	293	R/H	cGt/cAt	rs747823104	deleterious(0)	probably_damaging(0.997)	25.9	medium
2:26534250-26534250	C	0.035	T	missense_variant	MODERATE	GPR113	ENSG00000173567	2346	2346	782	I/M	atA/atG	rs114354727	deleterious(0)	probably_damaging(0.944)	12.48	-
2:26534250-26534250	C	0.035	T	missense_variant	MODERATE	GPR113	ENSG00000173567	2332	1749	583	I/M	atA/atG	rs114354727	deleterious(0)	possibly_damaging(0.894)	12.48	-
2:26534250-26534250	C	0.035	T	missense_variant	MODERATE	GPR113	ENSG00000173567	2192	2139	713	I/M	atA/atG	rs114354727	deleterious(0)	probably_damaging(0.936)	12.48	-
2:26534250-26534250	C	0.035	T	missense_variant	MODERATE	GPR113	ENSG00000173567	1837	1155	385	I/M	atA/atG	rs114354727	deleterious(0)	possibly_damaging(0.901)	12.48	-
2:26534250-26534250	C	0.035	T	missense_variant,NMD_transcript_variant	MODERATE	GPR113	ENSG00000173567	2332	1749	583	I/M	atA/atG	rs114354727	deleterious(0)	possibly_damaging(0.894)	12.48	-
2:71337204-71337204	A	0.005	G	missense_variant	MODERATE	MCEE	ENSG00000124370	445	427	143	R/C	Cgc/Tgc	rs138436961	deleterious(0)	probably_damaging(0.989)	25.2	high
2:71337204-71337204	A	0.005	G	missense_variant	MODERATE	MCEE	ENSG00000124370	133	133	45	R/C	Cgc/Tgc	rs138436961	deleterious(0.01)	probably_damaging(0.984)	25.2	high
2:71376471-71376471	A	0.006	G	missense_variant	MODERATE	MPHOSPH10	ENSG00000124383	2136	1784	595	R/Q	cGg/cAg	rs115361918	deleterious(0.04)	probably_damaging(0.977)	26.5	medium
3:101391010-101391010	T	0.001	G	missense_variant	MODERATE	ZBTB11	ENSG00000066422	939	358	120	Q/K	Cag/Aag	rs142875469	deleterious_low_confidence(0.05)	probably_damaging(0.98)	25.9	medium
3:10331519-10331519	T	0.007	C	missense_variant	MODERATE	GHRL	ENSG00000157017	120	116	39	R/Q	cGa/cAa	rs34911341	deleterious(0.05)	probably_damaging(0.996)	25.5	medium
3:10331519-10331519	T	0.007	C	missense_variant	MODERATE	GHRL	ENSG00000157017	117	113	38	R/Q	cGa/cAa	rs34911341	deleterious(0.04)	probably_damaging(0.998)	25.5	medium
3:111427172-111427172	C	0.026 (gnomAD)	T	missense_variant	MODERATE	PLCXD2	ENSG00000240891	1133	563	188	L/P	cTg/cCg	rs370255847	deleterious(0)	probably_damaging(0.999)	25.4	medium
3:111427172-111427172	C	0.026 (gnomAD)	T	missense_variant	MODERATE	PLCXD2	ENSG00000240891	887	563	188	L/P	cTg/cCg	rs370255847	deleterious(0)	probably_damaging(1)	25.4	medium
3:134226075-134226075	T	0.002 (gnomAD)	C	missense_variant	MODERATE	CEP63	ENSG00000182923	504	169	57	R/C	Cgt/Tgt	rs765915059	deleterious(0)	probably_damaging(0.992)	26.2	medium
3:134226075-134226075	T	0.002 (gnomAD)	C	missense_variant	MODERATE	CEP63	ENSG00000182923	342	169	57	R/C	Cgt/Tgt	rs765915059	deleterious(0)	probably_damaging(0.999)	26.2	medium
3:134226075-134226075	T	0.002 (gnomAD)	C	missense_variant	MODERATE	CEP63	ENSG00000182923	456	169	57	R/C	Cgt/Tgt	rs765915059	deleterious(0)	probably_damaging(0.987)	26.2	medium
3:134226075-134226075	T	0.002 (gnomAD)	C	missense_variant	MODERATE	CEP63	ENSG00000182923	340	169	57	R/C	Cgt/Tgt	rs765915059	deleterious(0)	probably_damaging(0.978)	26.2	medium
3:134226075-134226075	T	0.002 (gnomAD)	C	missense_variant	MODERATE	CEP63	ENSG00000182923	310	169	57	R/C	Cgt/Tgt	rs765915059	deleterious(0.02)	probably_damaging(0.999)	26.2	medium
3:134226075-134226075	T	0.002 (gnomAD)	C	missense_variant	MODERATE	CEP63	ENSG00000182923	546	169	57	R/C	Cgt/Tgt	rs765915059	deleterious(0)	probably_damaging(0.999)	26.2	medium
3:134226075-134226075	T	0.002 (gnomAD)	C	missense_variant	MODERATE	CEP63	ENSG00000182923	596	169	57	R/C	Cgt/Tgt	rs765915059	deleterious(0)	probably_damaging(0.999)	26.2	medium
3:134226075-134226075	T	0.002 (gnomAD)	C	missense_variant	MODERATE	CEP63	ENSG00000182923	497	169	57	R/C	Cgt/Tgt	rs765915059	deleterious(0)	probably_damaging(0.999)	26.2	medium
3:139085969-139085969	T	0.002 (gnomAD)	C	missense_variant	MODERATE	COPB2	ENSG00000184432	1746	1564	522	E/K	Gaa/Aaa	rs746330302	deleterious(0)	probably_damaging(0.994)	32	high
3:139085969-139085969	T	0.002 (gnomAD)	C	missense_variant	MODERATE	COPB2	ENSG00000184432	1607	1477	493	E/K	Gaa/Aaa	rs746330302	deleterious(0)	probably_damaging(0.994)	32	high
3:139085969-139085969	T	0.002 (gnomAD)	C	missense_variant	MODERATE	COPB2	ENSG00000184432	433	433	145	E/K	Gaa/Aaa	rs746330302	deleterious(0.01)	possibly_damaging(0.841)	32	high
3:148916215-148916215	A	0.031	G	missense_variant	MODERATE	CP	ENSG00000047457	1915	1652	551	T/I	aCt/aTt	rs61733458	deleterious(0)	probably_damaging(0.945)	27.2	-
3:148916215-148916215	A	0.031	G	missense_variant	MODERATE	CP	ENSG00000047457	1001	1001	334	T/I	aCt/aTt	rs61733458	deleterious(0)	probably_damaging(0.964)	27.2	-
3:148916215-148916215	A	0.031	G	missense_variant,NMD_transcript_variant	MODERATE	CP	ENSG00000047457	1687	1652	551	T/I	aCt/aTt	rs61733458	deleterious(0)	possibly_damaging(0.833)	27.2	-
3:170584249-170584249	A	0.009	C	missense_variant	MODERATE	RPL22L1	ENSG00000163584	605	289	97	V/F	Gtt/Ttt	rs13462	deleterious(0)	possibly_damaging(0.847)	27.6	high
3:30769819-30769819	T	0.021	C	missense_variant	MODERATE	GADL1	ENSG00000144644	1632	1481	494	R/H	cGc/cAc	rs62636628	deleterious(0)	probably_damaging(0.996)	32	medium
3:37114282-37114282	A	0.009 (gnomAD)	C	missense_variant,splice_region_variant	MODERATE	LRRFIP2	ENSG00000093167	1060	911	304	G/V	gGg/gTg	rs765229432	deleterious(0)	possibly_damaging(0.897)	33	medium
3:46003735-46003735	T	0.012	C	missense_variant	MODERATE	FYCO1	ENSG00000163820	3625	3419	1140	R/Q	cGg/cAg	rs41289620	deleterious(0)	probably_damaging(0.999)	32	medium
3:46003735-46003735	T	0.012	C	missense_variant	MODERATE	FYCO1	ENSG00000163820	3504	3419	1140	R/Q	cGg/cAg	rs41289620	deleterious(0)	probably_damaging(0.994)	32	medium
3:46007846-46007846	T	0.015	C	missense_variant	MODERATE	FYCO1	ENSG00000163820	3186	2980	994	E/K	Gag/Aag	rs34801630	deleterious(0.03)	probably_damaging(0.972)	29.3	medium
3:46007846-46007846	T	0.015	C	missense_variant	MODERATE	FYCO1	ENSG00000163820	3065	2980	994	E/K	Gag/Aag	rs34801630	deleterious(0.03)	probably_damaging(0.996)	29.3	medium
3:48538649-48538649	C	0.018 (gnomAD)	A	missense_variant	MODERATE	SHISA5	ENSG00000164054	491	154	52	C/G	Tgt/Ggt	rs1418186199	deleterious(0)	probably_damaging(0.997)	24.4	medium
3:48538649-48538649	C	0.018 (gnomAD)	A	missense_variant	MODERATE	SHISA5	ENSG00000164054	299	61	21	C/G	Tgt/Ggt	rs1418186199	deleterious(0)	probably_damaging(0.997)	24.4	medium
3:48538649-48538649	C	0.018 (gnomAD)	A	missense_variant	MODERATE	SHISA5	ENSG00000164054	451	61	21	C/G	Tgt/Ggt	rs1418186199	deleterious(0)	probably_damaging(0.997)	24.4	medium
3:48538649-48538649	C	0.018 (gnomAD)	A	missense_variant	MODERATE	SHISA5	ENSG00000164054	189	154	52	C/G	Tgt/Ggt	rs1418186199	deleterious(0)	probably_damaging(0.994)	24.4	medium
3:48538649-48538649	C	0.018 (gnomAD)	A	missense_variant	MODERATE	SHISA5	ENSG00000164054	275	61	21	C/G	Tgt/Ggt	rs1418186199	deleterious(0)	probably_damaging(0.997)	24.4	medium
3:48538649-48538649	C	0.018 (gnomAD)	A	missense_variant,NMD_transcript_variant	MODERATE	SHISA5	ENSG00000164054	225	154	52	C/G	Tgt/Ggt	rs1418186199	deleterious(0)	probably_damaging(0.994)	24.4	medium
3:49311484-49311484	G	-	A	missense_variant,splice_region_variant	MODERATE	C3orf62	ENSG00000188315	539	530	177	I/T	aTt/aCt	-	deleterious(0.04)	probably_damaging(0.996)		-
3:52394055-52394055	A	0.024	G	missense_variant	MODERATE	DNAH1	ENSG00000114841	4792	4531	1511	V/M	Gtg/Atg	rs61734638	deleterious(0)	possibly_damaging(0.868)	24.0	-
3:53844306-53844306	T	0.009 (gnomAD)	C	missense_variant	MODERATE	CACNA1D	ENSG00000157388	6351	6233	2078	A/V	gCg/gTg	rs757425708	deleterious_low_confidence(0)	probably_damaging(0.988)	28.8	medium
3:53844306-53844306	T	0.009 (gnomAD)	C	missense_variant	MODERATE	CACNA1D	ENSG00000157388	6684	6173	2058	A/V	gCg/gTg	rs757425708	deleterious_low_confidence(0)	probably_damaging(0.967)	28.8	medium
3:53844306-53844306	T	0.009 (gnomAD)	C	missense_variant	MODERATE	CACNA1D	ENSG00000157388	6101	6101	2034	A/V	gCg/gTg	rs757425708	deleterious_low_confidence(0)	probably_damaging(0.997)	28.8	medium
3:58145348-58145348	C	0.008	T	missense_variant	MODERATE	FLNB	ENSG00000136068	7214	7049	2350	I/T	aTt/aCt	rs116826041	deleterious(0)	possibly_damaging(0.861)	28.0	medium
3:87018099-87018099	A	0.012	T	missense_variant	MODERATE	VGLL3	ENSG00000206538	954	578	193	H/L	cAt/cTt	rs79345443	deleterious(0.01)	probably_damaging(0.996)	23.6	medium
3:87018099-87018099	A	0.012	T	missense_variant	MODERATE	VGLL3	ENSG00000206538	378	380	127	H/L	cAt/cTt	rs79345443	deleterious(0.02)	possibly_damaging(0.848)	23.6	medium
4:106155185-106155185	G	0.022	C	missense_variant	MODERATE	TET2	ENSG00000168769	490	86	29	P/R	cCt/cGt	rs12498609	deleterious(0)	possibly_damaging(0.867)	23.5	medium
4:106155185-106155185	G	0.022	C	missense_variant	MODERATE	TET2	ENSG00000168769	472	86	29	P/R	cCt/cGt	rs12498609	deleterious(0)	possibly_damaging(0.867)	23.5	medium
4:110638824-110638824	T	0.008	C	missense_variant	MODERATE	PLA2G12A	ENSG00000123739	490	325	109	D/N	Gac/Aac	rs114816312	deleterious(0)	possibly_damaging(0.843)	27.4	medium
4:114279674-114279674	A	0.032	C	missense_variant	MODERATE	ANK2	ENSG00000145362	9953	9900	3300	S/R	agC/agA	rs34270799	deleterious_low_confidence(0.01)	possibly_damaging(0.885)	23.2	medium
4:114279674-114279674	A	0.032	C	missense_variant	MODERATE	ANK2	ENSG00000145362	930	930	310	S/R	agC/agA	rs34270799	deleterious(0)	possibly_damaging(0.82)	23.2	medium
4:140058849-140058849	T	0.009	A	missense_variant	MODERATE	ELF2	ENSG00000109381	213	7	3	S/T	Tca/Aca	rs62623564	deleterious(0.01)	probably_damaging(0.953)	24.8	medium
4:140058849-140058849	T	0.009	A	missense_variant	MODERATE	ELF2	ENSG00000109381	510	7	3	S/T	Tca/Aca	rs62623564	deleterious(0.01)	probably_damaging(0.953)	24.8	medium
4:140058849-140058849	T	0.009	A	missense_variant,NMD_transcript_variant	MODERATE	ELF2	ENSG00000109381	491	7	3	S/T	Tca/Aca	rs62623564	deleterious_low_confidence(0.01)	probably_damaging(0.973)	24.8	medium
4:151520216-151520216	A	0.033	G	missense_variant	MODERATE	LRBA	ENSG00000198589	6233	5989	1997	R/C	Cgt/Tgt	rs35879351	deleterious(0.01)	probably_damaging(0.966)	32	medium
4:151520216-151520216	A	0.033	G	missense_variant	MODERATE	LRBA	ENSG00000198589	6284	5989	1997	R/C	Cgt/Tgt	rs35879351	deleterious(0.01)	probably_damaging(0.954)	32	medium
4:151520216-151520216	A	0.033	G	missense_variant	MODERATE	LRBA	ENSG00000198589	1947	1948	650	R/C	Cgt/Tgt	rs35879351	deleterious(0.01)	possibly_damaging(0.858)	32	medium
4:151520216-151520216	A	0.033	G	missense_variant	MODERATE	LRBA	ENSG00000198589	6274	5989	1997	R/C	Cgt/Tgt	rs35879351	deleterious(0.01)	probably_damaging(0.975)	32	medium
4:151520216-151520216	A	0.033	G	missense_variant	MODERATE	LRBA	ENSG00000198589	6463	5989	1997	R/C	Cgt/Tgt	rs35879351	deleterious(0.01)	probably_damaging(0.981)	32	medium
4:41631718-41631718	T	0.048	C	missense_variant	MODERATE	LIMCH1	ENSG00000064042	1672	1238	413	T/M	aCg/aTg	rs28622470	deleterious_low_confidence(0)	probably_damaging(0.999)	17.94	-
4:47455100-47455100	C	0.004	T	missense_variant	MODERATE	COMMD8	ENSG00000169019	575	507	169	I/M	atA/atG	rs150753801	deleterious(0)	probably_damaging(0.977)	14.36	medium
4:68619638-68619638	T	0.000 (gnomAD)	C	missense_variant	MODERATE	GNRHR	ENSG00000109163	441	416	139	R/H	cGc/cAc	rs104893842	deleterious(0)	probably_damaging(0.999)	31	medium
4:68619638-68619638	T	0.000 (gnomAD)	C	missense_variant	MODERATE	GNRHR	ENSG00000109163	416	416	139	R/H	cGc/cAc	rs104893842	deleterious(0.02)	probably_damaging(0.997)	31	medium
4:70460361-70460361	T	0.003	C	missense_variant	MODERATE	UGT2A1	ENSG00000173610	1252	1138	380	E/K	Gaa/Aaa	rs148464836	deleterious(0)	probably_damaging(0.999)	29.1	-
4:70460361-70460361	T	0.003	C	missense_variant	MODERATE	UGT2A1	ENSG00000173610	1194	1138	380	E/K	Gaa/Aaa	rs148464836	deleterious(0)	probably_damaging(0.999)	29.1	-
4:70460361-70460361	T	0.003	C	missense_variant	MODERATE	UGT2A1	ENSG00000173610	1123	1006	336	E/K	Gaa/Aaa	rs148464836	deleterious(0)	probably_damaging(0.999)	29.1	-
4:70460361-70460361	T	0.003	C	missense_variant	MODERATE	UGT2A1	ENSG00000270386	1752	1636	546	E/K	Gaa/Aaa	rs148464836	deleterious(0)	probably_damaging(0.962)	29.1	-
4:70460361-70460361	T	0.003	C	missense_variant	MODERATE	UGT2A2	ENSG00000271271	1165	1165	389	E/K	Gaa/Aaa	rs148464836	deleterious(0)	probably_damaging(0.997)	29.1	-
4:70460361-70460361	T	0.003	C	missense_variant	MODERATE	UGT2A2	ENSG00000271271	1035	1036	346	E/K	Gaa/Aaa	rs148464836	deleterious(0)	probably_damaging(0.999)	29.1	-
4:70460361-70460361	T	0.003	C	missense_variant	MODERATE	UGT2A2	ENSG00000271271	1167	1168	390	E/K	Gaa/Aaa	rs148464836	deleterious(0)	probably_damaging(1)	29.1	-
5:1038075-1038075	T	0.010	C	missense_variant	MODERATE	NKD2	ENSG00000145506	1172	943	315	R/W	Cgg/Tgg	rs35433301	deleterious(0)	probably_damaging(0.998)	18.49	medium
5:34945012-34945012	A	0.007	G	missense_variant	MODERATE	DNAJC21	ENSG00000168724	1251	1024	342	V/M	Gtg/Atg	rs144600070	deleterious(0.01)	probably_damaging(0.937)	26.2	medium
5:34945012-34945012	A	0.007	G	missense_variant	MODERATE	DNAJC21	ENSG00000168724	1251	1024	342	V/M	Gtg/Atg	rs144600070	deleterious(0.01)	probably_damaging(0.971)	26.2	medium
5:65350481-65350481	T	0.042	C	missense_variant	MODERATE	ERBB2IP	ENSG00000112851	21	23	8	S/L	tCa/tTa	rs3805466	deleterious(0.02)	probably_damaging(0.996)	25.1	-
5:96508943-96508943	T	0.016	C	missense_variant	MODERATE	RIOK2	ENSG00000058729	592	523	175	V/I	Gtt/Att	rs35713904	deleterious(0.01)	probably_damaging(0.985)	28.1	medium
5:96508943-96508943	T	0.016	C	missense_variant	MODERATE	RIOK2	ENSG00000058729	554	523	175	V/I	Gtt/Att	rs35713904	deleterious(0.01)	probably_damaging(0.986)	28.1	medium
6:142400020-142400020	T	0.024	G	missense_variant	MODERATE	NMBR	ENSG00000135577	584	443	148	P/H	cCc/cAc	rs138994608	deleterious(0)	probably_damaging(1)	27.7	medium
6:149783095-149783095	C	0.047	T	missense_variant	MODERATE	ZC3H12D	ENSG00000178199	565	317	106	K/R	aAa/aGa	rs61997220	deleterious(0.01)	probably_damaging(0.996)	28.1	medium
6:149783095-149783095	C	0.047	T	missense_variant	MODERATE	ZC3H12D	ENSG00000178199	636	317	106	K/R	aAa/aGa	rs61997220	deleterious(0.01)	probably_damaging(0.996)	28.1	medium
6:149783095-149783095	C	0.047	T	missense_variant	MODERATE	ZC3H12D	ENSG00000178199	470	317	106	K/R	aAa/aGa	rs61997220	deleterious(0.02)	probably_damaging(0.999)	28.1	medium
6:149783095-149783095	C	0.047	T	missense_variant	MODERATE	ZC3H12D	ENSG00000178199	587	317	106	K/R	aAa/aGa	rs61997220	deleterious(0.01)	probably_damaging(0.998)	28.1	medium
6:152477135-152477135	A	-	Τ	missense_variant	MODERATE	SYNE1	ENSG00000131018	7580	7460	2487	D/V	gAt/gTt	-	deleterious(0)	probably_damaging(0.933)	-	-
6:152477135-152477135	A	-	Τ	missense_variant	MODERATE	SYNE1	ENSG00000131018	2654	2654	885	D/V	gAt/gTt	-	deleterious(0)	probably_damaging(0.913)	-	-
6:152477135-152477135	A	-	Τ	missense_variant	MODERATE	SYNE1	ENSG00000131018	24490	23888	7963	D/V	gAt/gTt	-	deleterious(0)	probably_damaging(0.933)	-	-
6:152477135-152477135	A	-	Τ	missense_variant	MODERATE	SYNE1	ENSG00000131018	1826	1826	609	D/V	gAt/gTt	-	deleterious(0)	possibly_damaging(0.862)	-	-
6:152477135-152477135	A	-	Τ	missense_variant	MODERATE	SYNE1	ENSG00000131018	24112	23675	7892	D/V	gAt/gTt	-	deleterious(0)	possibly_damaging(0.89)	-	-
6:160482796-160482796	T	0.009 (gnomAD)	G	missense_variant	MODERATE	IGF2R	ENSG00000197081	3566	3418	1140	G/W	Ggg/Tgg	rs1562362303	deleterious(0)	probably_damaging(1)	26.5	-
6:169621600-169621600	A	0.009	G	missense_variant	MODERATE	THBS2	ENSG00000186340	3546	3296	1099	P/L	cCc/cTc	rs140852957	deleterious(0)	probably_damaging(1)	29.2	medium
6:27216699-27216699	T	0.031	G	missense_variant	MODERATE	PRSS16	ENSG00000112812	326	311	104	S/I	aGc/aTc	rs5030965	deleterious(0.01)	possibly_damaging(0.854)	23.8	medium
6:27216699-27216699	T	0.031	G	missense_variant,NMD_transcript_variant	MODERATE	PRSS16	ENSG00000112812	348	311	104	S/I	aGc/aTc	rs5030965	deleterious(0.03)	probably_damaging(0.941)	23.8	medium
6:27216699-27216699	T	0.031	G	missense_variant,NMD_transcript_variant	MODERATE	PRSS16	ENSG00000112812	318	311	104	S/I	aGc/aTc	rs5030965	deleterious(0.02)	probably_damaging(0.967)	23.8	medium
6:39073225-39073225	T	0.001	G	missense_variant	MODERATE	SAYSD1	ENSG00000112167	587	334	112	P/T	Ccc/Acc	rs181991702	deleterious(0.01)	possibly_damaging(0.881)	23.7	medium
6:4995464-4995464	T	0.042	C	missense_variant	MODERATE	RPP40	ENSG00000124787	905	871	291	V/I	Gtt/Att	rs12332997	deleterious(0)	probably_damaging(0.995)	23.8	medium
6:4995464-4995464	T	0.042	C	missense_variant	MODERATE	RPP40	ENSG00000124787	985	940	314	V/I	Gtt/Att	rs12332997	deleterious(0)	probably_damaging(0.987)	23.8	medium
6:4995464-4995464	T	0.042	C	missense_variant	MODERATE	RPP40	ENSG00000124787	890	760	254	V/I	Gtt/Att	rs12332997	deleterious(0)	probably_damaging(0.987)	23.8	medium
6:52268446-52268446	G	0.000 (gnomAD)	T	missense_variant	MODERATE	PAQR8	ENSG00000170915	612	435	145	F/L	ttT/ttG	rs139194968	deleterious(0)	probably_damaging(0.951)	22.9	-
6:52268446-52268446	G	0.000 (gnomAD)	T	missense_variant	MODERATE	PAQR8	ENSG00000170915	609	435	145	F/L	ttT/ttG	rs139194968	deleterious(0)	probably_damaging(0.951)	22.9	-
6:90660954-90660954	C	0.017	G	missense_variant	MODERATE	BACH2	ENSG00000112182	1579	871	291	L/V	Ctc/Gtc	rs61754114	deleterious(0.01)	probably_damaging(0.991)	24.4	medium
6:90660954-90660954	C	0.017	G	missense_variant	MODERATE	BACH2	ENSG00000112182	1403	871	291	L/V	Ctc/Gtc	rs61754114	deleterious(0.01)	probably_damaging(0.991)	24.4	medium
6:90660954-90660954	C	0.017	G	missense_variant	MODERATE	BACH2	ENSG00000112182	1574	871	291	L/V	Ctc/Gtc	rs61754114	deleterious(0.01)	probably_damaging(0.991)	24.4	medium
7:100677645-100677645	A	0.012 (gnomAD)	C	missense_variant	MODERATE	MUC17	ENSG00000169876	3012	2948	983	T/N	aCt/aAt	rs114262718	deleterious(0)	probably_damaging(0.931)	14.63	medium
7:100677645-100677645	A	0.012 (gnomAD)	C	missense_variant,NMD_transcript_variant	MODERATE	MUC17	ENSG00000169876	3012	2948	983	T/N	aCt/aAt	rs114262718	deleterious(0.01)	probably_damaging(0.931)	14.63	medium
7:107592470-107592470	T	-	C	missense_variant	MODERATE	LAMB1	ENSG00000091136	3509	3278	1093	G/E	gGg/gAg	-	deleterious(0.03)	possibly_damaging(0.842)	-	-
7:107592470-107592470	T	-	C	missense_variant	MODERATE	LAMB1	ENSG00000091136	3535	3350	1117	G/E	gGg/gAg	-	deleterious(0.03)	probably_damaging(0.921)	-	-
7:1097555-1097555	A	0.002	G	missense_variant	MODERATE	GPR146	ENSG00000164849	415	404	135	R/Q	cGg/cAg	rs61997249	deleterious(0.01)	probably_damaging(0.973)	25.4	medium
7:1097555-1097555	A	0.002	G	missense_variant	MODERATE	GPR146	ENSG00000164849	627	404	135	R/Q	cGg/cAg	rs61997249	deleterious(0.01)	probably_damaging(0.973)	25.4	medium
7:1097555-1097555	A	0.002	G	missense_variant	MODERATE	GPR146	ENSG00000164849	511	404	135	R/Q	cGg/cAg	rs61997249	deleterious(0.04)	probably_damaging(0.973)	25.4	medium
7:128454762-128454762	A	0.024	G	missense_variant	MODERATE	CCDC136	ENSG00000128596	3201	2834	945	R/Q	cGg/cAg	rs61730244	deleterious(0)	probably_damaging(0.996)	29.5	medium
7:138487701-138487701	A	0.000 (gnomAD)	G	missense_variant	MODERATE	TMEM213	ENSG00000214128	361	208	70	G/S	Ggc/Agc	rs201459325	deleterious(0)	probably_damaging(1)	26.8	medium
7:138487701-138487701	A	0.000 (gnomAD)	G	missense_variant	MODERATE	TMEM213	ENSG00000214128	363	361	121	G/S	Ggc/Agc	rs201459325	deleterious(0)	probably_damaging(1)	26.8	medium
7:138487701-138487701	A	0.000 (gnomAD)	G	missense_variant	MODERATE	TMEM213	ENSG00000214128	364	211	71	G/S	Ggc/Agc	rs201459325	deleterious(0)	probably_damaging(1)	26.8	medium
7:138487701-138487701	A	0.000 (gnomAD)	G	missense_variant	MODERATE	TMEM213	ENSG00000214128	237	139	47	G/S	Ggc/Agc	rs201459325	deleterious(0)	probably_damaging(0.999)	26.8	medium
7:149430430-149430430	A	-	G	missense_variant	MODERATE	KRBA1	ENSG00000133619	2783	2384	795	G/E	gGg/gAg	-	deleterious(0)	probably_damaging(0.978)	-	-
7:149430430-149430430	A	-	G	missense_variant	MODERATE	KRBA1	ENSG00000133619	2603	2204	735	G/E	gGg/gAg	-	deleterious(0)	possibly_damaging(0.886)	-	-
7:149430430-149430430	A	-	G	missense_variant	MODERATE	KRBA1	ENSG00000133619	2204	2204	735	G/E	gGg/gAg	-	deleterious(0)	possibly_damaging(0.886)	-	-
7:55560052-55560052	T	0.000 (gnomAD)	C	missense_variant	MODERATE	VOPP1	ENSG00000154978	452	251	84	R/H	cGc/cAc	rs201023957	deleterious(0)	probably_damaging(0.996)	28.9	medium
7:55560052-55560052	T	0.000 (gnomAD)	C	missense_variant	MODERATE	VOPP1	ENSG00000154978	333	50	17	R/H	cGc/cAc	rs201023957	deleterious_low_confidence(0)	probably_damaging(0.996)	28.9	medium
7:55560052-55560052	T	0.000 (gnomAD)	C	missense_variant	MODERATE	VOPP1	ENSG00000154978	483	50	17	R/H	cGc/cAc	rs201023957	deleterious_low_confidence(0)	probably_damaging(0.996)	28.9	medium
7:55560052-55560052	T	0.000 (gnomAD)	C	missense_variant	MODERATE	VOPP1	ENSG00000154978	397	200	67	R/H	cGc/cAc	rs201023957	deleterious_low_confidence(0)	probably_damaging(0.996)	28.9	medium
7:55560052-55560052	T	0.000 (gnomAD)	C	missense_variant	MODERATE	VOPP1	ENSG00000154978	286	245	82	R/H	cGc/cAc	rs201023957	deleterious(0)	probably_damaging(0.996)	28.9	medium
7:55560052-55560052	T	0.000 (gnomAD)	C	missense_variant	MODERATE	VOPP1	ENSG00000154978	485	50	17	R/H	cGc/cAc	rs201023957	deleterious_low_confidence(0)	probably_damaging(0.996)	28.9	medium
7:55560052-55560052	T	0.000 (gnomAD)	C	missense_variant	MODERATE	VOPP1	ENSG00000154978	357	50	17	R/H	cGc/cAc	rs201023957	deleterious_low_confidence(0)	probably_damaging(0.996)	28.9	medium
7:55560052-55560052	T	0.000 (gnomAD)	C	missense_variant	MODERATE	VOPP1	ENSG00000154978	391	224	75	R/H	cGc/cAc	rs201023957	deleterious_low_confidence(0)	probably_damaging(0.996)	28.9	medium
7:55560052-55560052	T	0.000 (gnomAD)	C	missense_variant	MODERATE	VOPP1	ENSG00000154978	470	50	17	R/H	cGc/cAc	rs201023957	deleterious_low_confidence(0)	probably_damaging(0.996)	28.9	medium
7:55560052-55560052	T	0.000 (gnomAD)	C	missense_variant	MODERATE	VOPP1	ENSG00000154978	280	50	17	R/H	cGc/cAc	rs201023957	deleterious_low_confidence(0)	probably_damaging(0.996)	28.9	medium
7:55560052-55560052	T	0.000 (gnomAD)	C	missense_variant	MODERATE	VOPP1	ENSG00000154978	196	62	21	R/H	cGc/cAc	rs201023957	deleterious_low_confidence(0)	probably_damaging(0.994)	28.9	medium
7:55560052-55560052	T	0.000 (gnomAD)	C	missense_variant	MODERATE	VOPP1	ENSG00000154978	336	50	17	R/H	cGc/cAc	rs201023957	deleterious_low_confidence(0)	probably_damaging(0.996)	28.9	medium
7:55560052-55560052	T	0.000 (gnomAD)	C	missense_variant	MODERATE	VOPP1	ENSG00000154978	242	242	81	R/H	cGc/cAc	rs201023957	deleterious_low_confidence(0)	probably_damaging(0.994)	28.9	medium
8:101670026-101670026	T	0.010	G	missense_variant	MODERATE	SNX31	ENSG00000174226	332	70	24	P/T	Ccc/Acc	rs147303659	deleterious(0)	possibly_damaging(0.88)	10.02	-
8:121467725-121467725	G	0.002	A	missense_variant,NMD_transcript_variant	MODERATE	MTBP	ENSG00000172167	584	535	179	K/E	Aaa/Gaa	rs147929406	deleterious(0.02)	probably_damaging(0.997)	20.3	medium
8:12285202-12285202	G	0.026	T	missense_variant	MODERATE	FAM86B2	ENSG00000145002	856	856	286	N/H	Aac/Cac	rs200871887	deleterious(0)	probably_damaging(0.996)	22.5	medium
8:12285202-12285202	G	0.026	T	missense_variant	MODERATE	FAM86B2	ENSG00000145002	754	754	252	N/H	Aac/Cac	rs200871887	deleterious(0)	possibly_damaging(0.857)	22.5	medium
8:12285202-12285202	G	0.026	T	missense_variant	MODERATE	FAM86B2	ENSG00000145002	407	172	58	N/H	Aac/Cac	rs200871887	deleterious_low_confidence(0)	probably_damaging(0.992)	22.5	medium
8:12285202-12285202	G	0.026	T	missense_variant	MODERATE	FAM86B2	ENSG00000145002	754	754	252	N/H	Aac/Cac	rs200871887	deleterious(0)	probably_damaging(0.992)	22.5	medium
8:126021414-126021414	T	0.011	A	missense_variant,splice_region_variant	MODERATE	SQLE	ENSG00000104549	1835	937	313	N/Y	Aat/Tat	rs118130263	deleterious(0)	probably_damaging(0.95)	25.5	medium
8:126021414-126021414	T	0.011	A	missense_variant,splice_region_variant	MODERATE	SQLE	ENSG00000104549	755	652	218	N/Y	Aat/Tat	rs118130263	deleterious(0)	possibly_damaging(0.879)	25.5	medium
8:140944585-140944585	T	0.021	C	missense_variant	MODERATE	C8orf17	ENSG00000250733	1170	56	19	T/M	aCg/aTg	rs2233233	deleterious_low_confidence(0)	possibly_damaging(0.895)	15.67	-
8:18080308-18080308	T	0.005	A	missense_variant	MODERATE	NAT1	ENSG00000171428	925	752	251	D/V	gAt/gTt	rs56172717	deleterious(0)	probably_damaging(1)	23.6	medium
8:18080308-18080308	T	0.005	A	missense_variant	MODERATE	NAT1	ENSG00000171428	1390	752	251	D/V	gAt/gTt	rs56172717	deleterious(0)	probably_damaging(1)	23.6	medium
8:18080308-18080308	T	0.005	A	missense_variant	MODERATE	NAT1	ENSG00000171428	1272	752	251	D/V	gAt/gTt	rs56172717	deleterious(0)	probably_damaging(1)	23.6	medium
8:18080308-18080308	T	0.005	A	missense_variant	MODERATE	NAT1	ENSG00000171428	1023	752	251	D/V	gAt/gTt	rs56172717	deleterious(0)	probably_damaging(1)	23.6	medium
8:18080308-18080308	T	0.005	A	missense_variant	MODERATE	NAT1	ENSG00000171428	1078	752	251	D/V	gAt/gTt	rs56172717	deleterious(0)	probably_damaging(1)	23.6	medium
8:18080308-18080308	T	0.005	A	missense_variant	MODERATE	NAT1	ENSG00000171428	1443	752	251	D/V	gAt/gTt	rs56172717	deleterious(0)	probably_damaging(1)	23.6	medium
8:18080308-18080308	T	0.005	A	missense_variant	MODERATE	NAT1	ENSG00000171428	1059	752	251	D/V	gAt/gTt	rs56172717	deleterious(0)	probably_damaging(1)	23.6	medium
8:18080308-18080308	T	0.005	A	missense_variant	MODERATE	NAT1	ENSG00000171428	1177	938	313	D/V	gAt/gTt	rs56172717	deleterious(0.02)	probably_damaging(1)	23.6	medium
9:14823184-14823184	A	0.000 (gnomAD)	G	missense_variant	MODERATE	FREM1	ENSG00000164946	3095	2311	771	L/F	Ctc/Ttc	rs748668463	deleterious(0.01)	probably_damaging(0.938)	24.3	medium
9:14823184-14823184	A	0.000 (gnomAD)	G	missense_variant	MODERATE	FREM1	ENSG00000164946	3130	2314	772	L/F	Ctc/Ttc	rs748668463	deleterious(0.01)	probably_damaging(0.938)	24.3	medium
9:14823184-14823184	A	0.000 (gnomAD)	G	missense_variant	MODERATE	FREM1	ENSG00000164946	3127	2311	771	L/F	Ctc/Ttc	rs748668463	deleterious(0.01)	probably_damaging(0.938)	24.3	medium
9:14823184-14823184	A	0.000 (gnomAD)	G	missense_variant,NMD_transcript_variant	MODERATE	FREM1	ENSG00000164946	3127	2311	771	L/F	Ctc/Ttc	rs748668463	deleterious(0.05)	probably_damaging(0.998)	24.3	medium
9:27062666-27062666	A	0.008	G	missense_variant	MODERATE	IFT74	ENSG00000096872	1898	1735	579	V/M	Gtg/Atg	rs138591335	deleterious(0)	probably_damaging(0.984)	27.7	medium
9:27062666-27062666	A	0.008	G	missense_variant	MODERATE	IFT74	ENSG00000096872	1862	1735	579	V/M	Gtg/Atg	rs138591335	deleterious(0)	probably_damaging(0.984)	27.7	medium
9:27062666-27062666	A	0.008	G	missense_variant	MODERATE	IFT74	ENSG00000096872	1906	1735	579	V/M	Gtg/Atg	rs138591335	deleterious(0)	probably_damaging(0.984)	27.7	medium
9:43915500-43915500	C	0.007	G	missense_variant	MODERATE	CNTNAP3B	ENSG00000154529	3976	3583	1195	G/R	Ggc/Cgc	rs587604741	deleterious(0.01)	possibly_damaging(0.85)	19.21	-
6:32010126-32010126	T	0.027 (gnomAD)	C	missense_variant	MODERATE	TNXB	ENSG00000231608	12360	12158	4053	R/H	cGc/cAc	rs201510617	deleterious(0)	probably_damaging(0.999)	31	-
6:32010126-32010126	T	0.027 (gnomAD)	C	missense_variant	MODERATE	TNXB	ENSG00000231608	12420	12218	4073	R/H	cGc/cAc	rs201510617	deleterious(0)	probably_damaging(0.998)	31	-
X:130409697-130409697	G	0.009	A	missense_variant	MODERATE	IGSF1	ENSG00000147255	3019	2939	980	V/A	gTg/gCg	rs147496468	deleterious(0)	probably_damaging(0.981)	24.6	medium
X:130409697-130409697	G	0.009	A	missense_variant	MODERATE	IGSF1	ENSG00000147255	3237	2954	985	V/A	gTg/gCg	rs147496468	deleterious(0)	probably_damaging(0.989)	24.6	medium
X:130409697-130409697	G	0.009	A	missense_variant	MODERATE	IGSF1	ENSG00000147255	3823	2912	971	V/A	gTg/gCg	rs147496468	deleterious(0)	probably_damaging(0.919)	24.6	medium
X:130409697-130409697	G	0.009	A	missense_variant	MODERATE	IGSF1	ENSG00000147255	3044	2912	971	V/A	gTg/gCg	rs147496468	deleterious(0)	probably_damaging(0.919)	24.6	medium
X:9905380-9905380	A	0.027 (gnomAD exomes)	G	missense_variant	MODERATE	SHROOM2	ENSG00000146950	3884	3794	1265	R/Q	cGg/cAg	rs763923609	deleterious(0)	probably_damaging(0.971)	24.0	medium
X:9905380-9905380	A	0.027 (gnomAD exomes)	G	missense_variant	MODERATE	SHROOM2	ENSG00000146950	1119	299	100	R/Q	cGg/cAg	rs763923609	deleterious_low_confidence(0)	probably_damaging(0.971)	24.0	medium
X:9905380-9905380	A	0.027 (gnomAD exomes)	G	missense_variant	MODERATE	SHROOM2	ENSG00000146950	1448	299	100	R/Q	cGg/cAg	rs763923609	deleterious(0)	probably_damaging(0.971)	24.0	medium
Y:13506614-13506614	T	0.000 (gnomAD exomes)	Α	missense_variant	MODERATE	SLC9B1P1	ENSG00000183704	221	221	74	I/N	aTt/aAt	rs770199770	deleterious(0.01)	probably_damaging(0.943)	20.7	-
